# 1 **Transcriptional mapping of the macaque retina and RPE-** 2 **choroid reveals conserved inter-tissue transcription drivers** 3 **and signaling pathways**

4  
5 Ameera Mungale<sup>1#</sup>, David M. McGaughey<sup>2#</sup>, Congxiao Zhang<sup>3</sup>, Sairah Yousaf<sup>1</sup>, James Liu<sup>1</sup>,  
6 Brian P. Brooks<sup>4</sup>, Arvydas Maminishkis<sup>3</sup>, Temesgen D. Fufa<sup>1</sup>, Robert B. Hufnagel<sup>1\*</sup>

7  
8 <sup>1</sup>Medical Genetics and Ophthalmic Genomics Unit, Ophthalmic Genetics and Visual Function  
9 Branch, National Eye Institute, National Institutes of Health

10 <sup>2</sup>Bioinformatics Group, Ophthalmic Genetics and Visual Function Branch, National Eye  
11 Institute, National Institutes of Health

12 <sup>3</sup>Section on Epithelial and Retinal Physiology and Disease, Ophthalmic Genetics and Visual  
13 Function Branch, National Eye Institute, National Institutes of Health

14 <sup>4</sup>Pediatric, Developmental & Genetic Ophthalmology Section, Ophthalmic Genetics and Visual  
15 Function Branch, National Eye Institute, National Institutes of Health

16  
17 #Equal contributors

18  
19 \*Correspondence: Robert B. Hufnagel ([robert.hufnagel@nih.gov](mailto:robert.hufnagel@nih.gov)): 10 Center Drive, rm 10N109,  
20 Bethesda, MD 10N109.

21  
22 Running title: Conserved primate macular transcriptome  
23  
24  
25  
26  
27  
28  
29  
30  
31  
32  
33  
34  
35  
36  
37  
38  
39  
40  
41  
42  
43  
44  
45

46 **Abstract**

47 Purpose: The macula and fovea comprise a highly sensitive visual detection tissue that is  
48 susceptible to common disease processes like age-related macular degeneration (AMD). Our  
49 understanding of the molecular determinants of high acuity vision remains unclear, as few model  
50 organisms possess a human-like fovea. We explore transcription factor networks and receptor-  
51 ligand interactions to elucidate tissue interactions in the macula and peripheral retina and  
52 concomitant changes in the underlying retinal pigment epithelium (RPE)/choroid.

53  
54 Methods: Poly-A selected, 100 bp paired-end RNA-sequencing (RNA-seq) was performed  
55 across the macular/foveal, perimacular, and temporal peripheral regions of the neural retina and  
56 RPE/choroid tissues of four adult Rhesus macaque eyes to characterize region- and tissue-  
57 specific gene expression. RNA-seq reads were mapped to both the macaque and human genomes  
58 for maximum alignment and analyzed for differential expression and Gene Ontology (GO)  
59 enrichment.

60  
61 Results: Comparison of the neural retina and RPE/choroid tissues indicated distinct, contiguously  
62 changing gene expression profiles from fovea through perimacula to periphery. Top GO  
63 enrichment of differentially expressed genes in the RPE/choroid included cell junction  
64 organization and epithelial cell development. Expression of transcriptional regulators and various  
65 disease-associated genes show distinct location-specific preference and retina-RPE/choroid  
66 tissue-tissue interactions.

67  
68 Conclusions: Regional gene expression changes in the macaque retina and RPE/choroid is  
69 greater than that found in previously published transcriptome analysis of the human retina and  
70 RPE/choroid. Further, conservation of human macula-specific transcription factor profiles and  
71 gene expression in macaque tissues suggest a conservation of programs required for retina and  
72 RPE/choroid function and disease susceptibility.

## 73 **Introduction**

74 The retina is a thin tissue of the posterior eye (range:  $166.9 \pm 20.9 \mu\text{m}$  -  $271.4 \pm 19.6 \mu\text{m}$ [1]  
75 essential for processing light and transmitting information to the brain through the optic nerve. It  
76 is composed of multiple layers, which contain seven cell classes including rod and cone  
77 photoreceptors, in apposition with the retinal pigment epithelium (RPE), which is underlaid by  
78 the choroid. The choroid is a vascular structure that supports the outer retina, the RPE is  
79 necessary for maintaining healthy photoreceptors, and rods mediate dark-adapted vision while  
80 cones are responsible for color vision[2, 3]. The relative composition of cell types varies across  
81 the retina, and provides visual function specializations, such as high acuity color vision at the  
82 fovea, which is cone photoreceptor rich and rod depleted. Furthermore, the neural retinal layers  
83 change in thickness and morphology, including the inner and outer nuclear layers of the  
84 photoreceptors, whereas the choroidal layer has increased thickness at the macula but the  
85 morphology of the entire layer remains relatively unchanged[4, 5]. Many genes have varied  
86 expression in different cell types and tissue layers, with 819 genes implicated in heritable retinal  
87 degenerations as of 2022 (RetNet, <https://sph.uth.edu/RetNet/>)[6, 7]. While retinal degeneration  
88 may initiate in a single tissue layer, eventually the disease progresses across all tissue layers [8].  
89 Importantly, retinal manifestations in many diseases are region specific. For example, Stargardt  
90 disease and Best disease primarily affect the macula and cause loss of central vision first,  
91 whereas retinitis pigmentosa initiates in the rod-rich periphery[9-12]. We hypothesize that this  
92 location-specific disease susceptibility of the retina is due to cellular specialization and region-  
93 dependent molecular interactions, which we can assess by regional layer-specific gene  
94 expression profiling of healthy retinae.

95  
96 Previous investigations of the transcriptomic landscape of the human retina support a significant  
97 differential gene expression between the retina and the RPE/choroid/sclera tissue layers as well  
98 as across macular and peripheral regions, as described by Li et al., 2014[13]. Comparison of  
99 gene expression between the nasal and temporal peripheries of retina and RPE/choroid/sclera  
100 tissues indicated little to no variability, yet macular and peripheral profiles remained distinct in  
101 each tissue[13]. Gene expression across the retina has shown to be consistent with the spatial  
102 distribution of photoreceptors and ganglion cells, and RPE-specific genes appear to be enriched  
103 in the periphery over the macula as outlined by Whitmore et al., 2014[14]. Further  
104 characterization of gene expression between foveal and peripheral retina has been conducted  
105 using single-cell RNA sequencing in both primate (*Macaca fascicularis*) by Peng et al., 2019[15]  
106 and human retina by Voight et al., 2019[16]. These studies showed variability in both cell type  
107 distribution and gene expression between foveal and peripheral retina[15, 16]. While it has been  
108 well established that regional differences exist across tissue layers in the primate retina, the  
109 molecular drivers of these differences remain unclear.

110  
111 Here we generate an RNA-seq dataset from adult Rhesus macaque (*Macaca mulatta*) eyes that  
112 reflect the changing photoreceptor composition of the contiguous macular/foveal, perimacular,  
113 and peripheral regions to determine tissue- and location-dependent differential gene expression  
114 of the neural retina and RPE/choroid. The use of matched retina and RPE/choroid tissue biopsies  
115 in this analysis with an additional perimacular sample provides a contiguous assessment of gene  
116 expression across location as opposed to a binary macular vs periphery comparison and allows  
117 for a more comprehensive look at patterns of gene expression and their related pathways and

118 ontologies. We additionally explore conservation of these shared and distinct pathways through a  
119 meta-analysis comparing our macaque datasets to previously published human data. Finally, we  
120 examine gene regulation via transcription factors and tissue-tissue interactions using  
121 ligand/receptor analysis to understand differences in the macular and peripheral retina and the  
122 affiliated changes in the RPE/choroid.

123

## 124 **Methods**

125

### 126 Animal Care

127 All experimental protocols were approved by the National Eye Institute Animal Care and Use  
128 Committee. Procedures were performed in accordance with the United States Public Health  
129 Service policy on the humane care and use of laboratory animals.

130

### 131 Tissue Acquisition

132 Postmortem eyes were enucleated from two adult Rhesus monkeys (*Macaca mulatta*), aged 13  
133 and 18 years. Two-millimeter punch biopsies were removed from macular/foveal, perimacular,  
134 temporal, and nasal regions of the retina. Following the biopsy, the tissues were separated into  
135 layers of neural retina and RPE/choroid using microdissection techniques. Biopsies were  
136 optimized for smallest diameter in other macaque samples in order to obtain the minimal number  
137 of cells required for RNA-sequencing. Optimization was performed by measuring total RNA  
138 yield in different sized biopsy samples as below and requiring a minimum of 200 ng as input for  
139 RNA-seq.

140

### 141 RNA Extraction

142 Total RNA was isolated from fresh tissues using the PicoPure™ RNA Isolation Kit (Applied  
143 Biosystems, Waltham, Massachusetts, USA) following mortar and pestle tissue homogenization.  
144 Extracted RNA samples were checked for quality using the 2100 Bioanalyzer (Agilent  
145 Technologies, Santa Clara, CA, USA) and only samples with RIN value > 6.5 were used (Range  
146 1 – 10).

147

### 148 RNA sequencing

149 Extracted RNA was prepared into 100 bp libraries for paired-end, poly-A-selected RNA  
150 sequencing on the Illumina HiSeq4000 at the NIH Intramural Sequencing Center.

151

### 152 Bioinformatic Analysis

153 Briefly, reads were quantified against the macaque genome Mmul\_8.0.1 using Salmon pseudo-  
154 alignment transcript quantification tool (version 0.13.0; Patro et al., 2017)[17], imported into R  
155 with tximport[18] and analyzed for differential expression using DESeq2, using the Rhesus  
156 macaque sample as a covariate [19]. Transcript reads were additionally aligned to the human  
157 genome (GRCH38, gencode version 30 [20], to supplement any unquantified genes. To select the  
158 gene name for each macaque transcript, we used the HGNC Comparison of Orthology  
159 Predictions[21] data, aggregated by the hcop R package (<https://github.com/stephenturner/hcop>).  
160 We counted the number of sources supporting each gene ID to transcript and selected the gene  
161 ID with the most support, as detailed in [https://github.com/davemcg/macaque\\_macula\\_RNA-  
162 seq/blob/master/analysis/01\\_QC\\_prelim\\_analysis.Rmd](https://github.com/davemcg/macaque_macula_RNA-seq/blob/master/analysis/01_QC_prelim_analysis.Rmd).

163

164 Genes were considered to be differentially expressed based on IHW[22] corrected p value <  
165 0.05. Gene lists were then assigned gene ontologies using the clusterProfiler “enrichGO”  
166 function[23].

167  
168 For the heatmap visualizations, we used length-scaled transcripts per million (TPM)  
169 quantification from tximport scaled by library size with the edgeR[24] “calcNormFactors”  
170 function. The heatmaps were made with the R package ComplexHeatmap[25].

171  
172 Human single cell transcriptome data from the scEiaD resource at [plae.nei.nih.gov](http://plae.nei.nih.gov) was searched  
173 for machine predicted RPE cells from fovea or peripheral punches. We found 217 cells, 159  
174 from the fovea and 58 from the periphery, across four studies[26-30]. The Seurat object was  
175 downloaded on 2022-01-14 from [plae.nei.nih.gov](http://plae.nei.nih.gov) and subsetted to these 217 cells. The Seurat  
176 object was converted to a SingleCellExperiment object to run wilcox and t tests with the scran  
177 “findMarkers” test and used the study as a covariate. Genes were kept which had both a wilcox  
178 AUC (area under curve) greater than 0.7 (1 is best), an  $\text{abs}(\log_2)$  fold change greater than 0.7, and  
179 a FDR corrected p value < 0.01. For the overlap testing we kept genes that had a  $\text{padj} < 0.01$  in  
180 each comparison (single cell human RPE, bulk human RPE-choroid, or bulk macaque RPE-  
181 choroid) and the direction of the fold change between fovea and peripheral was the same. The  
182 venn diagram was created with the R package eulerr ([https://cran.r-](https://cran.r-project.org/web/packages/eulerr/citation.html)  
183 [project.org/web/packages/eulerr/citation.html](https://cran.r-project.org/web/packages/eulerr/citation.html)).

184  
185 For the exact commands used in the analysis of this data, we make our Snakemake[31]  
186 reproducible workflow available at [https://github.com/davemcg/macaque\\_macula\\_RNA-seq](https://github.com/davemcg/macaque_macula_RNA-seq).

## 187 188 **Results**

189  
190 We performed RNA-seq on 2 mm retina and RPE/choroid tissues of 4 adult Rhesus macaque  
191 eyes in each of the central macular (foveal), perimacular, and peripheral regions (Fig. S1). Tissue  
192 dissections and RNA extractions were optimized for minimal input samples (<1  $\mu\text{g}$ ) to maximize  
193 spatial resolution. Principle component analysis (PCA) visualization indicates that samples group  
194 primarily by tissue. Foveal and peripheral samples generally cluster furthest from each other, and  
195 perimacular samples cluster in between (Fig. S2). We then assessed overall gene expression by  
196 tissue layer and location as well as differential gene expression between foveal samples and other  
197 peripheral samples (Table 1).

198  
199 Analysis of the foveal versus peripheral regions in the retina and RPE/choroid depicted distinct  
200 sets of differentially expressed genes in each tissue layer, with 9644 and 7925 differentially  
201 expressed genes in the retina and RPE/choroid, respectively ( $\text{Padj} < 0.05$ ) (Table 1). Many of the  
202 significantly differentially expressed genes are known to have tissue-specific roles in  
203 development and disease (Fig. 1A, 1B). Retinal diseases also manifest uniquely at particular  
204 regions of the RPE or retina. For example, Age-Related Macular Degeneration (AMD) is thought  
205 to begin in the macular RPE[32], Late Onset Retinal Degeneration manifests in the peripheral  
206 RPE[33], Retinitis Pigmentosa causes photoreceptor loss in the peripheral retina[10], and finally,  
207 Cone-Rod Dystrophies primarily affect photoreceptors in the central retina[34].

208

209 In order to confirm that the differentially expressed genes across locations further reflect cellular  
210 composition of different tissues, we used expression patterns of published rod-enriched genes as  
211 identified in Holt et al., 2015[6] and Mustafi et al., 2016[35]. We observed correlated gene  
212 expression between eyes and animals, as well as a progressive increase in rod-enriched gene  
213 expression from the fovea to the perimacula and then to the periphery, reflecting changes in  
214 neural retina composition (Fig. S3A). In this list of rod enriched genes, we find that our  
215 peripheral retina samples are 2.8 fold enriched in rod signal relative to the fovea (t test  $p < 3.5 \times 10^{-12}$ ).  
216 The perimacular region was enriched in rod signal by 1.7 fold over the fovea ( $p < 1.1 \times 10^{-9}$ ).  
217 The enrichment of cone gene expression between the fovea and peripheral retina samples was  
218 1.6 fold ( $p < 0.02$ ) (Fig. S3B, Table S1). Among the RPE samples the enrichment of rod and  
219 cone markers was less substantial and not significant (Figure S3C).

220  
221 Next, we performed an unfiltered analysis of the differentially expressed, contiguously changing  
222 genes from fovea to perimacula to periphery in the RPE/choroid. This analysis highlights  
223 stepwise changes due to changing photoreceptor composition in the cone-predominant macula,  
224 rod-predominant periphery, and admixed perimacula, and how these morphological changes in  
225 the neural retina may affect changing gene expression in the RPE/choroid. Differential  
226 expression analysis revealed distinct blocks of genes with low expression in the fovea that  
227 increase moving outward through the perimacula to the periphery, and other genes that are  
228 highly expressed in the fovea but progressively decrease moving outwards (Fig. 1C). We observe  
229 enrichment for gene ontologies including cell junction organization and epithelial cell  
230 development, as well as urogenital and renal system development (Fig. 1D).

231  
232 Next, we sought to understand the transcriptional regulators driving the spatial and inter-tissue  
233 differences in gene expression. Using a list of all known transcription factors in humans, we  
234 identified a subset which is differentially expressed by location in each of the retina (Fig. S4B)  
235 and RPE/choroid datasets (Fig. 1E). After conducting a literature review, we further identified  
236 transcription factors with known associations in the respective tissues. In the retina and RPE,  
237 distinct sets of fovea-enriched and periphery-enriched transcription were elucidated. Our data  
238 shows three transcription factors, *NFRF1*, *IRX2*, and *ZFHX4*, to be differentially expressed in  
239 both neural retina and RPE/choroid and show a similar pattern in independent human data  
240 curated from eyeIntegration[36] (Fig. S5). Interestingly, *ZFHX4* appears to be enriched in the  
241 macular neural retina and the peripheral RPE/choroid, whereas *NFRF1* and *IRX2* expression is  
242 present in both tissues.

243  
244 We then analyzed tissue-tissue interactions using ligand and receptor characterizations from the  
245 CellPhoneDB database[37]. After converting protein names from the database to gene names via  
246 the Uniprot conversion tool and merging the data with our location-based differential expression,  
247 we generated lists of distinct up- and down-regulated interactions in which both interacting  
248 partners in each tissue were either up- or downregulated in the fovea over the periphery (Table  
249 2). Pathway analysis on these gene lists shows enrichment in the upregulated interactors for cell  
250 adhesion pathways (Fig. 2A, C) and that downregulated interactors were highly enriched for Wnt  
251 signaling in kidney disease and the ErbB signaling pathway, both of which are heavily involved  
252 in tissue development, including ocular development (Fig. 2B, D, Fig. S7C-D).

253

254 To determine the conservation of location-specific differential expression of transcriptional  
255 regulators across fovea to periphery, we performed a meta-analysis comparing our macaque data  
256 to previously published human datasets[13, 14]. We see generally conserved patterns of  
257 expression from fovea to periphery in neural retina and to a lesser extent, RPE/choroid (Fig. 3A-  
258 B). We performed the same analysis on unfiltered gene lists from the human and macaque and  
259 found approximately 700 genes that follow similar differential expression patterns from fovea to  
260 periphery in both species. (Fig. 3A, Table 1S). GO terms for this list of conserved genes involve  
261 neuronal connectivity and cellular morphogenesis (Fig. 3C), similar to the GO terms for the  
262 macaque retina data seen previously in this study. In one case, we see a distinct block of macula-  
263 specific transcription factors in the Rhesus monkey neural retina including *HR*, *MYC*, *EBF3*, *AR*,  
264 *EBF2*, *EBF1*, *TWIST1*, *IRX2*, *POU4F2*, *IRX1*, and *SHOX2* that seem to also correlate to macula-  
265 specific transcription factors in the human data (Fig. S6B). Overall, this supports a conservation  
266 of gene expression and function across monkey and human species.

267  
268 To test whether there was any correspondence between our macaque tests and an independent  
269 single cell RPE cells taken from either the fovea or periphery, we extracted 219 cells from the  
270 scEiaD resource at [plae.nei.nih.gov](http://plae.nei.nih.gov). We found ten genes that overlap between our macaque  
271 resource and the scEiaD resource, including *VIM*, *S100B*, and *PMEL*. Of these overlapping  
272 genes, *CXCL4*, *SULF4*, and *WFDC1* are shown to be enriched in the macula (Figure 4).

## 273 274 **Discussion**

275  
276 Using the Rhesus macaque as a model to study the transcriptome landscape of higher primate  
277 retina, we conducted RNA-sequencing across neural retina and RPE/choroid tissue layers. The  
278 small RNA punch size and bulk processing of the tissues allowed for high resolution and  
279 sensitivity of transcript quantification due to the decreased likelihood of variability from  
280 extended amplification, gene dropouts, and biological noise. Furthermore, it allows for the ability  
281 to profile rare and low-expressed transcripts as compared to single-cell RNAseq such as the 10x  
282 Genomics Chromium platform, in which only the top 20-30% of expressed genes are captured,  
283 or Drop-seq, which requires a more manual approach. Unlike previous studies, our approach  
284 included the perimacular retina to define contiguously changing gene expression across the  
285 retinal landscape, thereby reflecting the stepwise differences in the ratio of cone and rod  
286 composition. By doing this, we isolated the critical pathways regulating changes in retinal  
287 connectivity and RPE/choroid function necessary to support different photoreceptor mosaics.

288  
289 The macaque gene expression changes observed in our data are orthogonally confirmed in  
290 human datasets. Furthermore, our findings also indicate conservation of contiguously changing  
291 gene expression patterns from the central to peripheral retina between Rhesus monkeys and  
292 humans, establishing a more available model system for future human transcriptomic studies.  
293 Rhesus monkeys offer an accessible model in which conditions of tissue acquisition can be  
294 further controlled, including age, optimization of biopsy and RNA extraction, and reduced time  
295 from enucleation to tissue dissection and RNA extraction.

296  
297 PCA of gene expression data by tissue type predicts the distinct nature of the neural retina and  
298 RPE/choroid tissues, and further clustering by location confirms there are transcriptomic  
299 differences between regions of the retina. The grouping of transcriptomes by animal highlights

300 the genetic variability observed between individuals. The lower number of differentially  
301 expressed genes in fovea vs perimacular comparisons versus fovea vs periphery indicates a  
302 continuum of gene expression. The highly variable patterns of gene expression across the neural  
303 retina corresponds to the changing composition of cell types based on location.

304  
305 In contrast, the presence of distinct changing RPE/choroid gene expression suggests variability  
306 in the cell processes occurring across the retina in the RPE and choroid. Due to the relatively  
307 unchanged morphology of these tissues across the retina save for increased RPE diameter and  
308 choroidal thickness in the macula, the contiguous changes in gene expression observed may be a  
309 factor in driving changes in cell processes across the entire retina. GO terms enriched for the  
310 contiguously changing genes in the retina involved neuron projection and axon development as  
311 well as regulation of cell morphogenesis, supporting known findings that there are differences in  
312 circuitry and cone packing across the neural retina[10]. Furthermore, the changing gene  
313 expression across the RPE/choroid is enriched for GO terms such as cell junction organization  
314 and epithelial cell development, supporting reported findings that RPE diameter is smaller in the  
315 fovea/macula as compared to the periphery[38]. It is known that RPE cells form tight junctions,  
316 creating the outer blood-retinal barrier. These tight junctions serve as regulators of cell  
317 proliferation, polarity, and transport, as well as transducers of signals responsible for regulating  
318 cell size and shape[39]. Therefore, genes involved in cell junction organization and epithelial cell  
319 development may play a role in varied cell sizes across the RPE. GO terms involving urogenital  
320 and renal system development are also enriched in the RPE/choroid gene list, and interestingly,  
321 there are several heritable genetic conditions that affect both the eye and kidney, and there is also  
322 a link between chorioretinal thinning and chronic kidney disease, thought to be due to  
323 inflammation and endothelial dysfunction[40, 41]. In addition to observing greater levels of gene  
324 expression variability across location in the RPE-choroid than expected, several disease-relevant  
325 genes known to play roles in various ocular disorders including *TIMP3* (various  
326 retinopathies[42]), *ABCA4* (Stargardt disease[12]), and *TYRP1* (oculocutaneous albinism[43]),  
327 were found to be significantly differentially expressed by location.

328  
329 Differential expression of particular transcription factors, including neural retina- and  
330 RPE/choroid show conserved patterns of expression between macaque and human datasets, with  
331 *IRX2* being upregulated in the macula. Other differentially expressed transcription factors that  
332 show conservation with past human studies include *FOXI3*, which is upregulated in the  
333 periphery, and *POU4F2*, *POU4F1*, as well as its target, *RIT2*, all of which are enriched in the  
334 macula in both monkey and human datasets<sup>7</sup>. Additional transcription factors following similar  
335 gene expression patterns across species in the RPE/choroid include *VEZFI* and *NR2F1*, which  
336 are thought to be involved in retinal and vascular development[44, 45]. Identifying conserved  
337 location-specific transcription factors can provide insight into the regulatory landscape of the two  
338 tissues and how they relate to patterns of differential gene expression. It may be inferred then,  
339 that these changes in global gene expression across location and tissue, driven by distinct sets of  
340 transcription factors, likely reflect location-specific cellular processes and interactions.

341  
342 Beyond patterns of transcriptional regulators, location-based tissue-tissue interactions are also  
343 indicative of specific pathways being up- or downregulated by location, suggesting specific roles  
344 in different locations of the tissues. The enrichment for Wnt signaling in kidney disease in the  
345 downregulated interactions in the macula may be connected to the GO enrichment for renal



346 development in the RPE/choroid. Furthermore, ErbB signaling and peptide G-protein coupled  
347 receptor signaling are required for retinal development, with ErbB involved in neural crest  
348 development and adult pigment formation[46] and GCPR signaling involved in light processing  
349 in photoreceptors[47]. The tissue-tissue interaction analysis suggests these pathways are  
350 upregulated in the peripheral tissues of the eye. Certain pathways were enriched for tissue-tissue  
351 interactions both up- and downregulated in the macula, including Hippo signaling. Hippo-YAP  
352 signaling is known to play roles in both ocular development as well as disease, as it regulates  
353 retinogenesis, photoreceptor cell differentiation, and retinal vascular development, but  
354 misregulation also has associations with coloboma and optic fissure closure, uveal melanoma,  
355 and retinal degeneration[48]. The widespread enrichment of this pathway informs the many roles  
356 it plays in regulating the retinal landscape across location.

357  
358 The three-way comparison of single cell, bulk human, and Rhesus macaque data showed many  
359 more differentially expressed genes detected in our macaque dataset than the other two  
360 sequencing methods. Furthermore, identifying differentially expressed genes in the Rhesus  
361 monkey data that intersect with the single cell data allows us to identify known RPE-specific  
362 genes that are conserved between the datasets including VIM[39], and PMEL[49], which we  
363 have shown to change contiguously by location. Of the three macula-enriched genes in the  
364 overlapping set, CXCL14 and WFDC1 have been previously identified as enriched in the macula  
365 compared to peripheral retina via RNA microarray[50], and WFDC1 enrichment in the macula  
366 was independently confirmed by both expression and immunostaining[51]. As such, our data  
367 shows the known macula-enrichment of WFDC1 to be conserved. As a serine protease inhibitor,  
368 mediator of endothelial cell migration and promoter of angiogenesis, its enrichment in the RPE  
369 and specifically, the macula, may suggest a role for WFDC1 in age-related macular degeneration  
370 [52], in which neovascularization beneath the macula is characteristic[50].

371  
372 Considering the differential gene expression patterns across contiguous regions of the neural  
373 retina and especially the RPE/choroid allows for a combined approach in which we assessed the  
374 drivers of change as well as gross changes in gene expression by location. We identified highly  
375 enriched gene ontologies associated with each tissue location and layer, highlighted sets of  
376 contiguously changing transcription factors, determined important tissue-tissue interactions that  
377 highlight various up- and down-regulated location-specific pathways, and examined the  
378 conservation of gene expression patterns across multiple independent studies. In addition to the  
379 previous RNA-sequencing studies performed on human and non-human primate retinas, the data  
380 and findings presented here provide valuable resources for future studies aimed at identifying  
381 regional specialization of the retina and understanding disease mechanisms.

### 382 **Acknowledgements**

384 We would like to thank Bob Wurtz, Bruce Cumming, James Cavanaugh, Mitch Smith  
385 of the Laboratory of Sensorimotor Research, National Eye Institute for providing non-human  
386 primate samples. We would also like to thank the NEI/NIMH Animal Program, including Jim  
387 Raber and Ginger Tansey, the National Institutes of Health Intramural Sequencing Center, where  
388 RNA sequencing was performed, and Dr. Sheldon Miller for helpful comments and advice about  
389 the experiments and manuscript.

390

391 **Table 1.** A summary of the differential gene expression ( $p_{adj} < 0.05$ ) in retina and RPE/choroid  
 392 by location.

| Tissue      | Location            | # Genes |
|-------------|---------------------|---------|
| Retina      | Fovea               | 6,921   |
|             | Perimacula          | 6,926   |
|             | Periphery           | 10,517  |
|             | Fovea vs Perimacula | 4,633   |
|             | Fovea vs Periphery  | 9,644   |
| RPE/Choroid | Fovea               | 6,775   |
|             | Perimacula          | 7,465   |
|             | Periphery           | 10,983  |
|             | Fovea vs Perimacula | 414     |
|             | Fovea vs Periphery  | 7,925   |

393 **Table 2.** Ligand-Receptor interactions across neural retina and RPE/choroid in the macula.  
 394

| Upregulated Interactions in the Macula |               | Downregulated Interactions in the Macula |               |
|----------------------------------------|---------------|------------------------------------------|---------------|
| RPE/Choroid                            | Neural Retina | RPE/Choroid                              | Neural Retina |
| NOTCH2                                 | JAG2          | EPHB2                                    | EFNB1         |
| FGFR1                                  | NCAM1         | WNT2B                                    | FZD4          |
| NTF3                                   | NTRK3         | EFNA1                                    | EPHA2         |
| IGF2                                   | IGF1R         | EPHB1                                    | EFNB1         |
| EPHA2                                  | EFNA3         | CCR1                                     | CCL26         |
| NOTCH1                                 | JAG2          | NRG2                                     | ERBB3         |
| PLXNB2                                 | SEMA4D        | CD48                                     | CD244         |
| NTF3                                   | NTRK2         | FLT3                                     | FLT3LG        |
| TNFSF10                                | TNFRSF10D     | DSC1                                     | DSG2          |
| EPHA3                                  | EFNA3         | EFNA1                                    | EPHA3         |
| TEK                                    | ANGPT1        | PTPRC                                    | CD22          |
| VEGFA                                  | FLT1          | CCR5                                     | CCL8          |
| PLXNB2                                 | SEMA4G        | LGALS9                                   | HAVCR2        |
| NOTCH3                                 | JAG2          | MDK                                      | ALK           |
| WNT1                                   | FZD1          | PLXNC1                                   | SEMA7A        |
| NRP1                                   | VEGFA         | ANXA1                                    | FPR2          |
| EGFR                                   | EGF           | FGFR1                                    | NCAM1         |
| EPHA4                                  | EFNB1         | CCR1                                     | CCL26         |
| NRP2                                   | SEMA3C        | NGF                                      | NTRK1         |
| ERBB4                                  | HBEGF         | CD48                                     | CD244         |
| IGF2                                   | IGF2R         | FZD7                                     | WNT3          |
| EFNA1                                  | EPHA2         | CCR6                                     | CCL20         |
| EPHB1                                  | EFNB1         | CCR2                                     | CCL26         |
| TNF                                    | TNFRSF1A      | CCR2                                     | CCL8          |

|       |         |        |          |
|-------|---------|--------|----------|
| IGF2  | IGF2R   | PLXNB2 | SEMA4C   |
| EFNA3 | EPHA4   | PVR    | CD96     |
| CD55  | ADGRE5  | NRG1   | ERBB4    |
| CD44  | SELE    | ERBB3  | NRG1     |
| ERBB4 | NRG4    | PTPRC  | CD22     |
| CADM3 | CADM1   | SEMA5A | PLXNB3   |
| EFNA1 | EPHA3   | CSF1R  | IL34     |
| CADM3 | EPB41L1 | CCR5   | CCL8     |
| VEGFA | FLT1    | PDCD1  | PDCD1LG2 |
| VEGFA | KDR     | CCR1   | CCL8     |
| NRP2  | PGF     | EREG   | ERBB4    |
| DPP4  | CXCL12  |        |          |
| EPHB6 | EFNB1   |        |          |
| NRP2  | VEGFA   |        |          |
| FLT1  | PGF     |        |          |
| EFNA1 | EPHA4   |        |          |
| NRP2  | SEMA3F  |        |          |

395

396

397

398

399

400

401

402

403

404

405

406

407

408

409

410

411

412

413

414

**Figure 1.** (A) A volcano plot depicting differentially expressed genes between foveal and peripheral tissues in the neural retina. Colored genes show significant up- or down- regulation with several labeled genes having known tissue-specific roles in development and disease including PDE6B. (B) A volcano plot showing RPE fovea vs periphery differential expression, with key genes labeled, including ABCA4 and TIMP3. (C) Unfiltered differential expression analysis of contiguously changing genes from fovea to perimacula to periphery in the RPE/choroid exhibits distinct blocks of lowly expressed genes in the fovea with a progressive increase in expression in peripheral tissues as well as blocks of genes with progressive downregulation moving outwards through the tissue despite less obvious morphologic changes in the tissue as compared to neural retina. (D) Top 10 enriched gene ontology (GO) terms from the RPE/choroid differentially expressed gene set include cell junction organization and epithelial cell development. VEGF is enriched in multiple of these ontologies and has increased expression in the macula over the periphery. (E) A subset of genes identified as differentially expressed transcription factors by location in the RPE/choroid. Changes in transcriptional regulators can be a factor in driving gene expression changes. \*These transcription factors have published associations with the respective tissue in the literature.

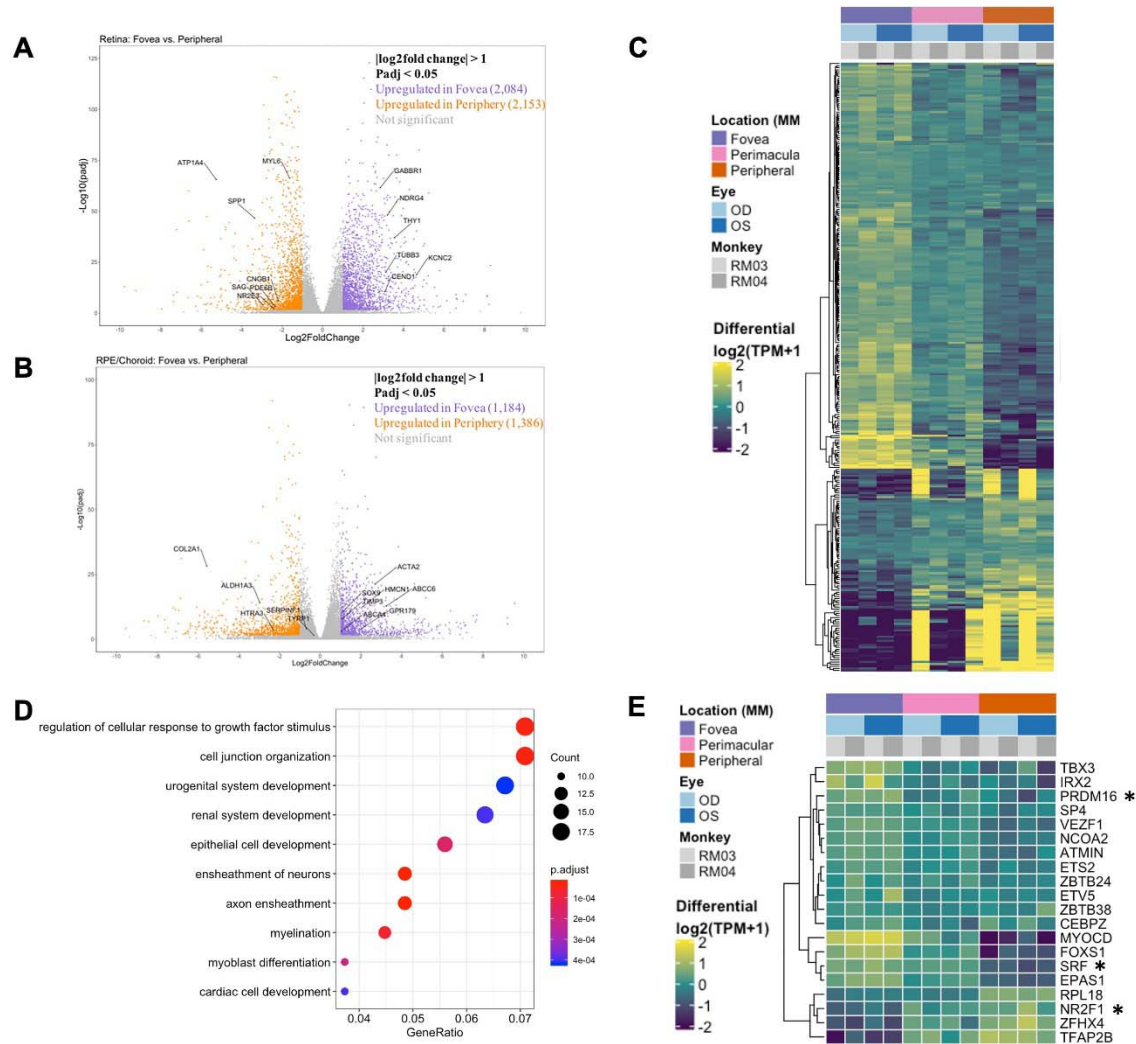

415  
416  
417  
418

419 **Figure 2.** Tissue-tissue interactions showing receptor/ligand pairs in the central retina. (A)  
420 Upregulated macular receptors in the RPE/choroid are linked to their upregulated ligand in the  
421 macular neural retina. Interactors are grouped by signaling pathway and the width is scaled by  
422 average  $\log_2$  fold change. (B) Downregulated macular receptors in the RPE/choroid and their  
423 respective downregulated ligand in the macular neural retina. (C) Upregulated macular ligands in  
424 the RPE/choroid are linked to their upregulated receptor in the macular neural retina. (D)  
425 Downregulated macular ligands in the RPE/choroid and their corresponding downregulated  
426 receptors in the macular neural retina.

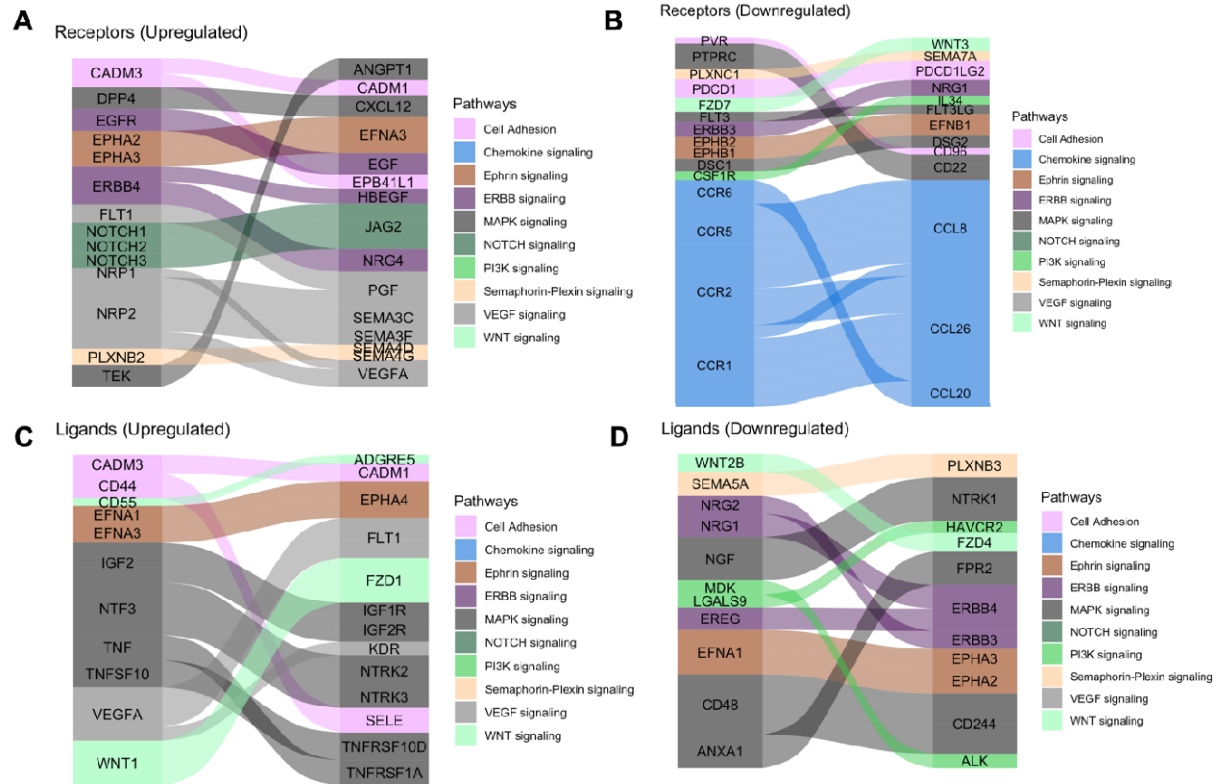

427  
428

429 **Figure 3.** (A) Heatmap displaying the comparison of differential gene expression in the neural  
430 retina between published data from a human macula vs periphery set (Li et al., 2014, Whitmore  
431 et. al, 2014) and the macaque data presented here, with 664 genes following similar expression  
432 patterns. (B) A comparison of conserved differential expression to the human studies in the  
433 RPE/choroid tissue. Fewer genes follow similar patterns of differential expression. (C) GO  
434 enrichment for conserved differentially expressed genes between human and macaque datasets in  
435 the neural retina. Terms including neuronal connectivity and cellular morphogenesis are highly  
436 enriched.

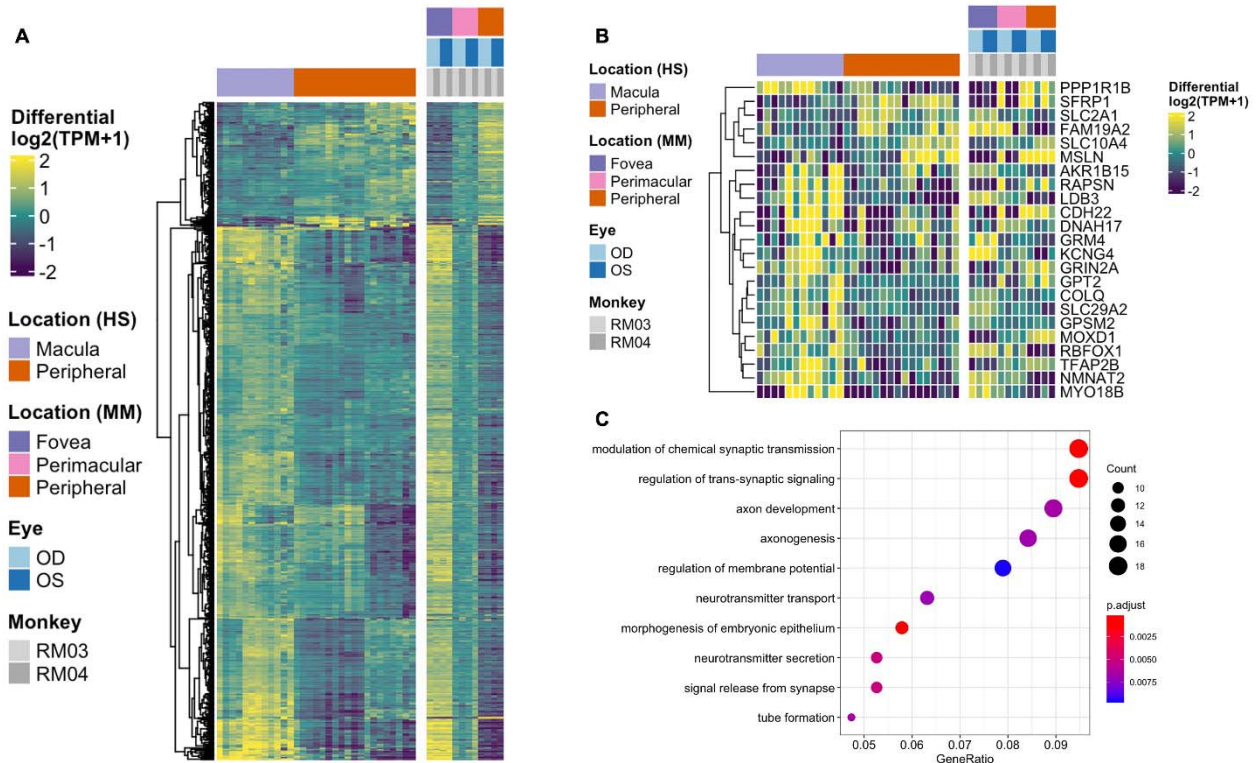

437  
438 **Figure 4.** (A) Venn diagram of overlaps between differentially expressed genes between the  
439 fovea and periphery in three systems: human single cell RPE, bulk human RPE-choroid, and  
440 bulk macaque RPE-choroid. (B) Violin plot of the single cell expression with the ten genes  
441 which overlap between the human single cell RPE testing and bulk macaque RPE-choroid  
442 testing. (C) Heatmap of the same ten genes in our macaque RPE-choroid punches.  
443

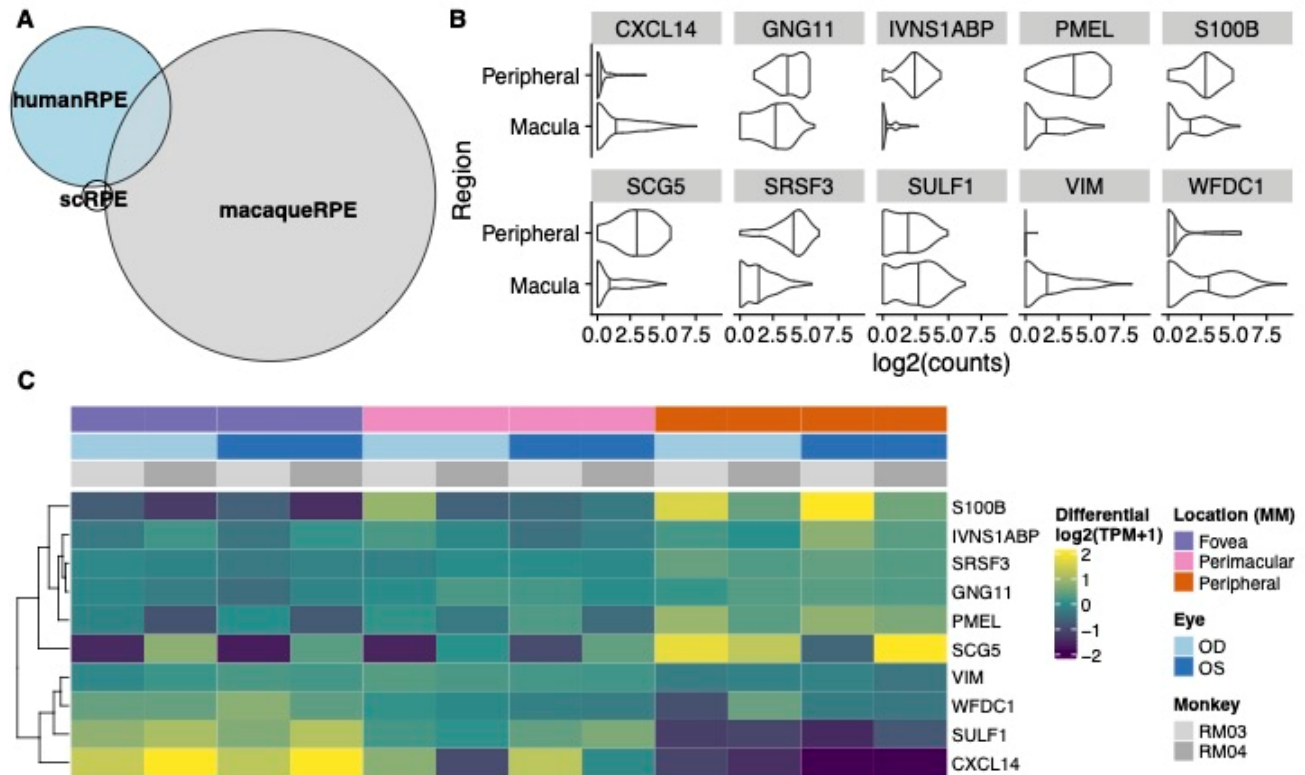

444

445

446

447

448

449

## Supplemental Data

**Figure S1.** (A) Layout of punch biopsies taken from the Rhesus monkey eyes, including foveal (F), perimacular (PM), and peripheral (P) samples. (B) Diagram of the retina, highlighting the cell types in the neural retina as well as the RPE and choroid tissues (made in Biorender).

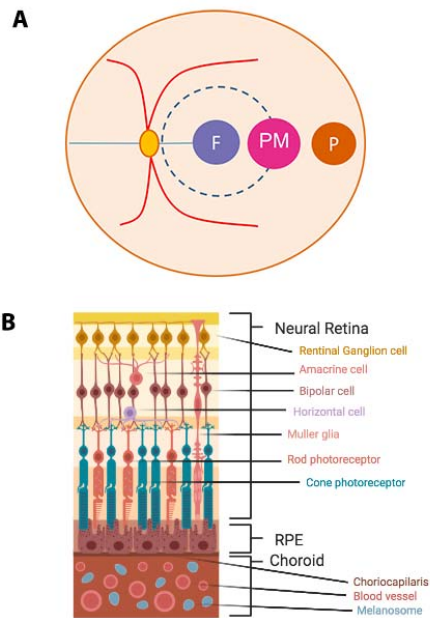

450  
451 **Figure S2.** PCA clustering for the 1000 most variable genes sequenced. (A) Samples primarily  
452 cluster by tissue type, with RPE/choroid samples clustering away from retina samples. (B)  
453 Within the retina and RPE/choroid, foveal and peripheral samples tend to cluster furthest apart  
454 with perimacular samples clustering less tightly between.



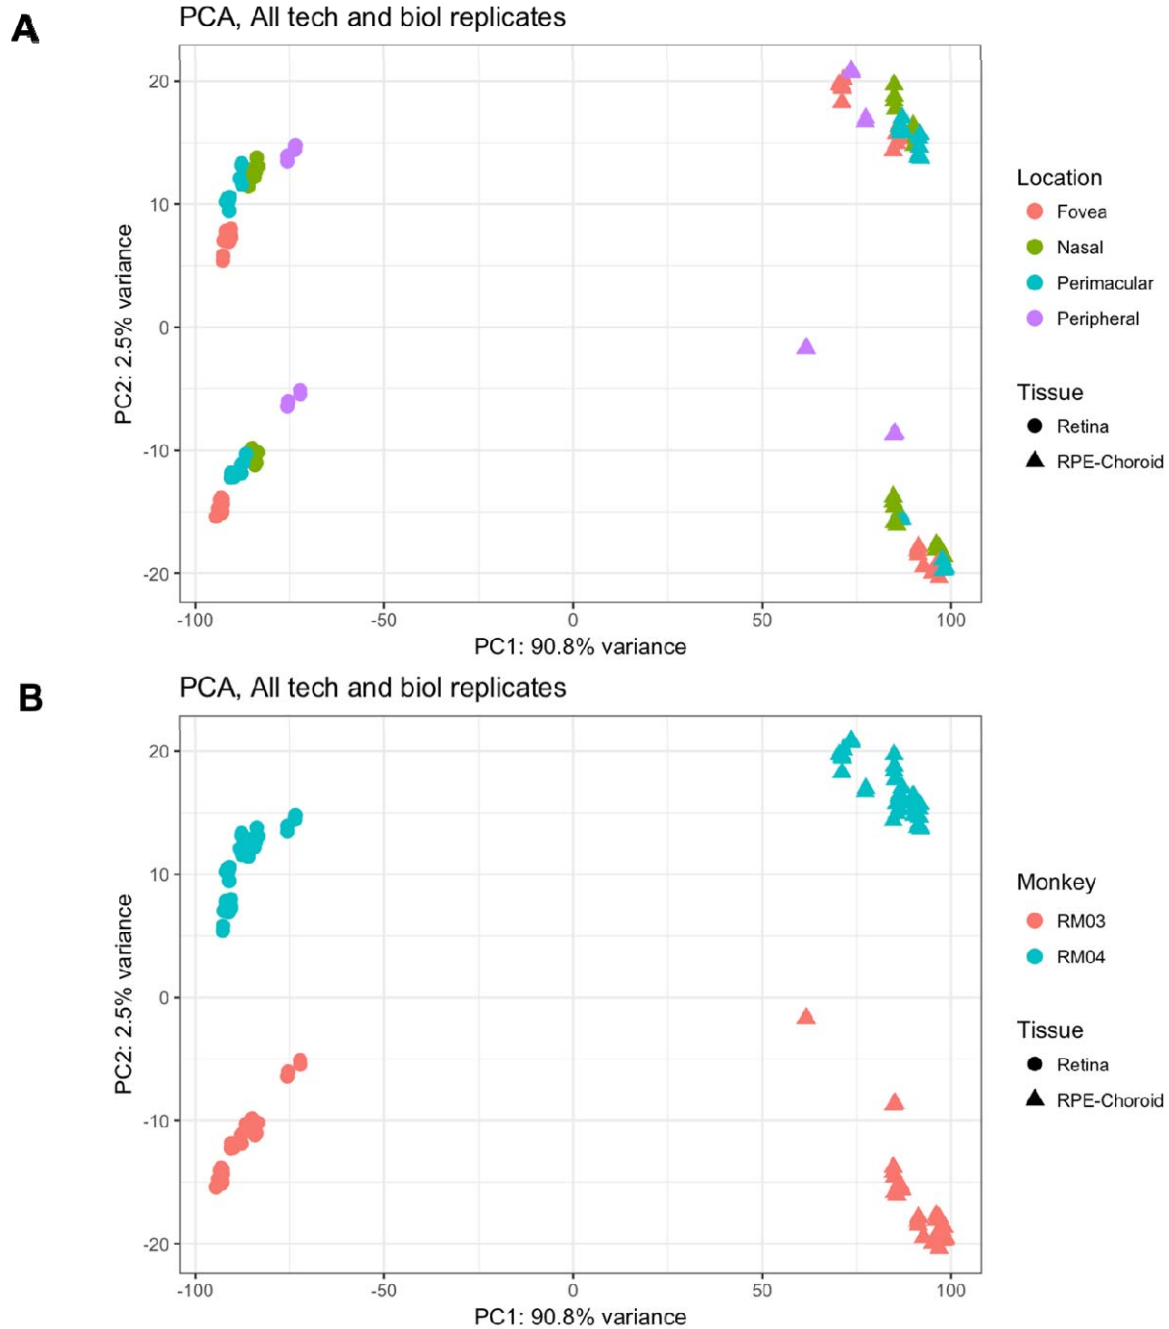

455  
456  
457  
458  
459  
460  
461  
462  
463  
464

**Figure S3.** (A) Heatmap depicting macaque expression of published rod-enriched gene expression (Holt et. al 2015, Mustafi et. al, 2016) across the neural retina reflects cellular composition of rods in the retina. Genes are highly expressed in the periphery, where rod composition is highly enriched, and lowly expressed in the fovea/macular which is highly cone-enriched. (B) Peripheral and perimacular retinal samples express rod-enriched genes at a 2.8- and 1.7-fold increase compared to foveal retinal samples. The periphery is 1.6-fold enriched in cone signal compared to the fovea in the neural retina (Table S1). (C) Changes in rod- and cone-enriched gene expression do not vary greatly by location in RPE/choroid.

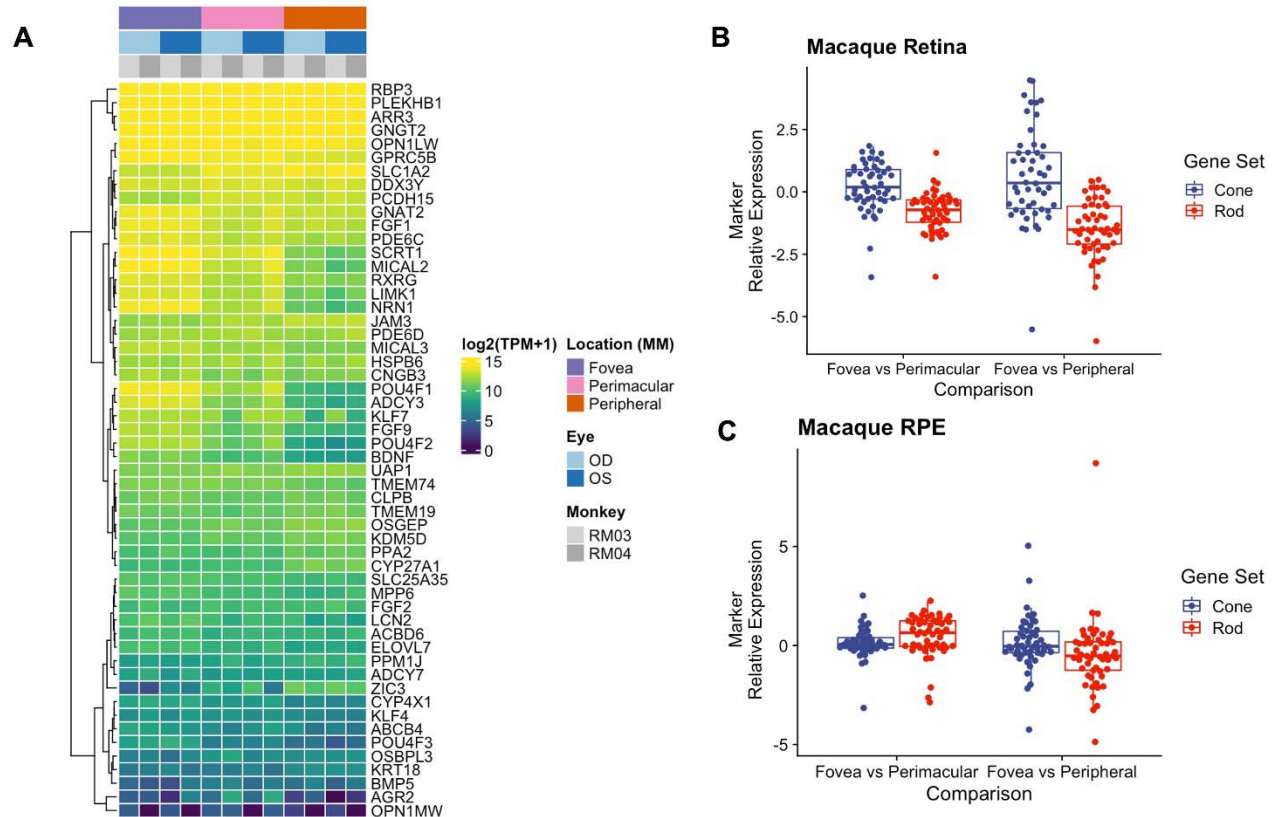

465  
466  
467  
468  
469  
470  
471  
472  
473  
474  
475  
476  
477

**Figure S4.** (A) Heatmap showing contiguous differential expression across location of the neural retina tissue, also exhibiting distinct blocks of progressive up and down regulated gene expression as seen for RPE/choroid in Fig. 1C. (B) A subset of genes identified as differentially expressed transcription factors by location in the neural retina. Changes in transcriptional regulators can be a factor in driving gene expression changes. \*These transcription factors have published associations with the respective tissue in the literature. (C) Top 10 enriched gene ontology (GO) terms from the retina differentially expressed gene set, including neuron projection, axon development, regulation of cell morphogenesis, and protein localization and transport.

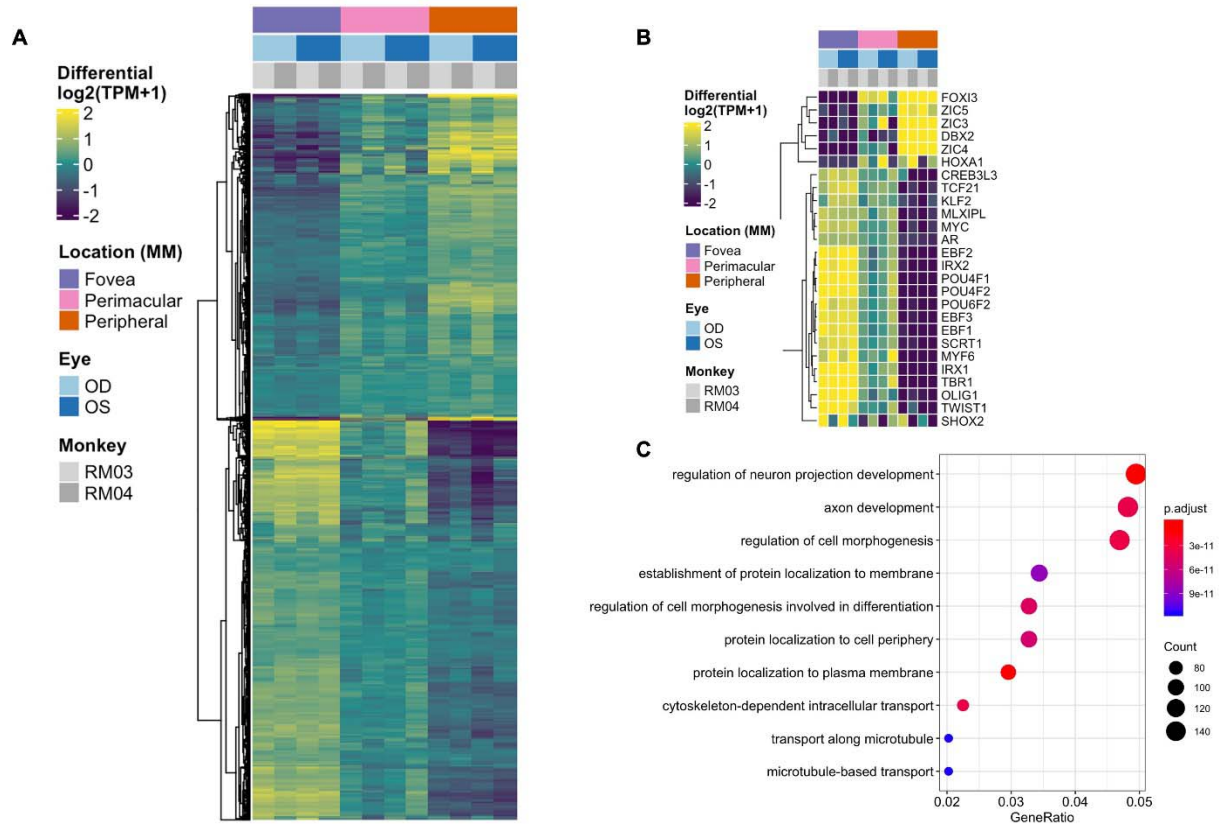

478  
479  
480  
481  
482  
483  
484  
485  
486  
487  
488

**Figure S5.** (A) Expression of commonly expressed transcription factors between the neural retina and the RPE/choroid. While *NR2F1* and *IRX2* follow similar expression patterns across location, *ZFH4* actually displays opposite expression patterns in the retina and RPE/choroid tissues. (B) Expression of these three transcription factors from the publicly available EyeIntegration database (Swami and McGaughey et al., 2019) showing similar expression levels of each gene in both tissue types with whole blood for comparison.

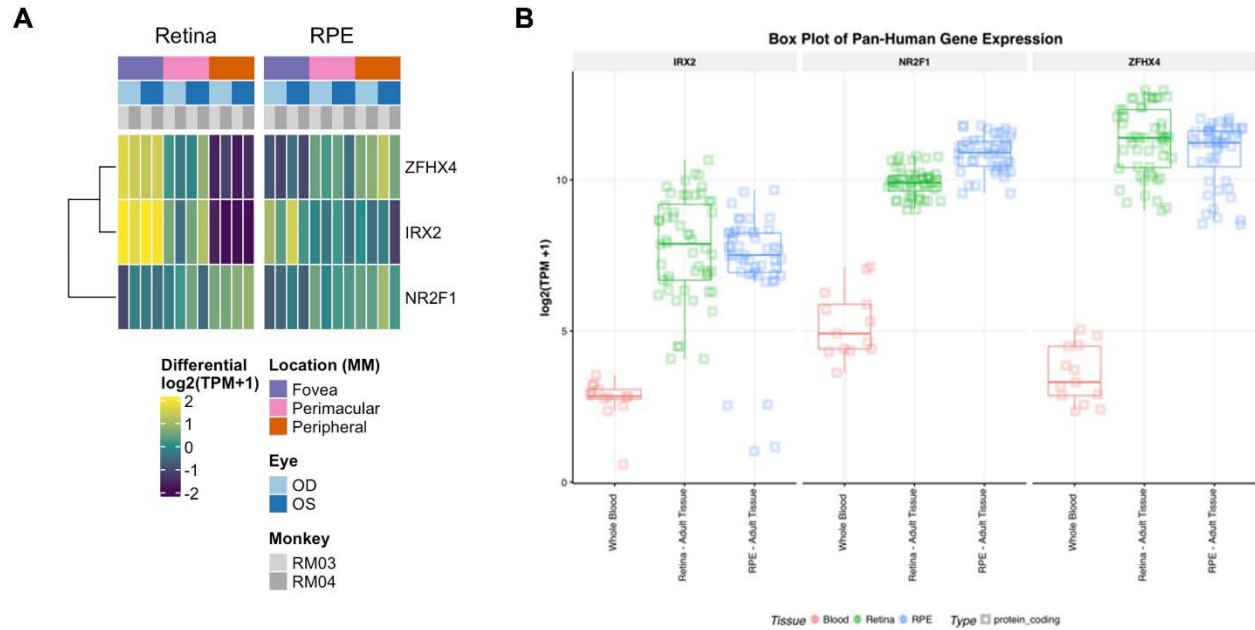

489  
 490  
 491  
 492  
 493  
 494  
 495  
 496  
 497  
 498  
 499

**Figure S6.** (A) A comparison of conserved transcription factor differential expression in the neural retina between published data from a human macula vs periphery set (Li et al., 2014, Whitmore et. al, 2014) and the macaque data presented here. (B) A similar comparison of human conservation of transcription factor differential expression in the RPE/choroid tissue. (C) Top enriched GO terms for the conserved gene expression across fovea to periphery in the RPE/choroid. Top terms include regulation of neurotransmitter levels and metabolic processes as well insulin secretion.

500

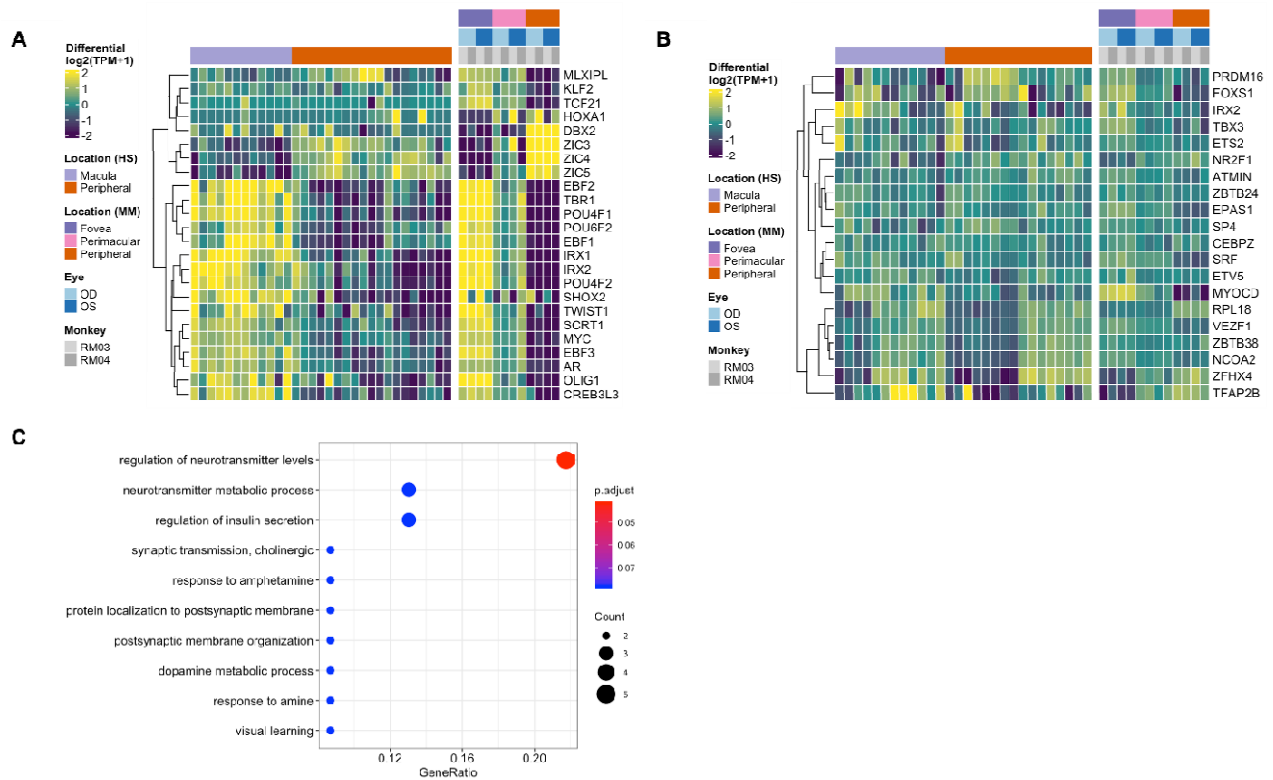

501  
502  
503  
504  
505  
506  
507  
508  
509  
510  
511

**Figure S7.** (A) Enrichr bar graph depicting highly enriched pathways via the WikiPathways 2019 Human database for the downregulated ligand/receptor interactions in the macula. Top enriched pathways include Wnt signaling in kidney disease and ErbB signaling. (B) Enrichr clustergram depicts the genes contributing to the enriched pathway terms including *WNT*, *FZD4*, and *ERBB3*. (C) Enrichr bar graph for upregulated ligand/receptor interactions in the macula. Top enriched pathways include PI3K-Akt signaling and Focal Adhesion-PI3K-Akt-mTOR, both of which are involved in the VEGF signaling pathway. (D) Enrichr clustergram is enriched for genes including *VEGFA*, *FLT1*, and *KDR*, all of which are key components of VEGF signaling.

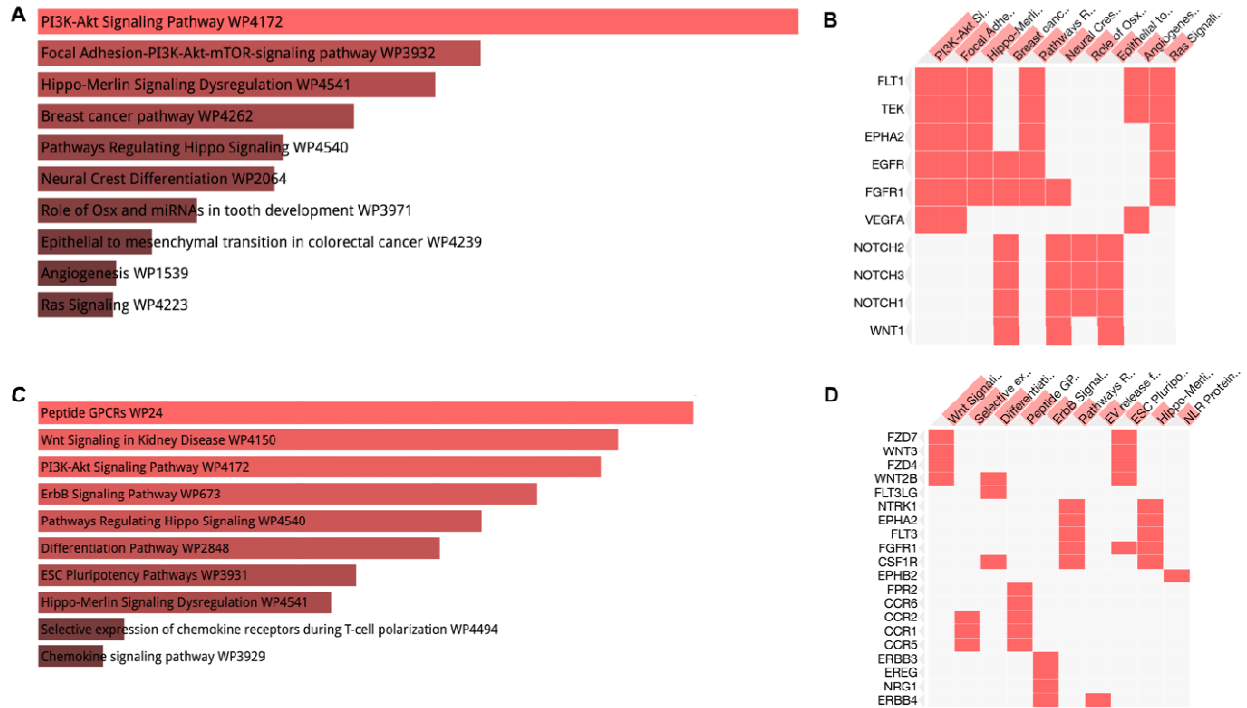

512  
513  
514  
515  
516  
517  
518  
519  
520  
521

**Table S1.** Rod- and Cone-Enriched gene expression in Retina and RPE/choroid compared across location

| Tissue | Comparison           | GeneSet | estimate   | enrichment | statistic  | p.value    | parameter | conf.low   | conf.high  |
|--------|----------------------|---------|------------|------------|------------|------------|-----------|------------|------------|
| Retina | Fovea vs Perimacular | Rod     | -0.7821306 | -1.7196686 | -7.4071987 | 1.11E-09   | 52        | -0.9940137 | -0.5702476 |
| Retina | Fovea vs Peripheral  | Rod     | -1.4620671 | -2.7550282 | -8.9989078 | 3.48E-12   | 52        | -1.7880902 | -1.1360439 |
| Retina | Fovea vs Perimacular | Cone    | 0.20531647 | 1.15293923 | 1.46077663 | 0.15045974 | 49        | -0.0771353 | 0.48776821 |
| Retina | Fovea vs Peripheral  | Cone    | 0.6492966  | 1.56840332 | 2.441338   | 0.01829112 | 49        | 0.11483133 | 1.18376187 |
| RPE    | Fovea vs Perimacular | Rod     | 0.47748612 | 1.39231546 | 3.3946687  | 0.00132244 | 52        | 0.1952359  | 0.75973635 |
| RPE    | Fovea vs Peripheral  | Rod     | -0.4613632 | -1.3768422 | -1.8370341 | 0.07192272 | 52        | -0.9653239 | 0.0425975  |
| RPE    | Fovea vs Perimacular | Cone    | 0.13785476 | 1.10026784 | 1.27906465 | 0.20689857 | 49        | -0.0787328 | 0.35444235 |
| RPE    | Fovea vs Peripheral  | Cone    | 0.14454836 | 1.10538455 | 0.76617502 | 0.44724757 | 49        | -0.2345828 | 0.52367948 |

522  
523  
524

**Table S2.** List of conserved genes between human and macaque data as seen in the heatmap (Fig. 3A)

|         |          |         |        |          |          |          |          |
|---------|----------|---------|--------|----------|----------|----------|----------|
| AACS    | CCDC88C  | ELOVL6  | IFT22  | MTA2     | POLR2G   | SHKBP1   | TMEM189  |
| ABCA1   | CCDC92   | EMB     | IGIP   | MTMR4    | POPDC3   | SHOX2    | TMEM246  |
| ABCG1   | CCER2    | EMC8    | IK     | MTURN    | PPARG    | SIAE     | TMEM26   |
| ABHD10  | CCM2     | EML4    | IKBKE  | MVD      | PPIF     | SIAH2    | TMEM37   |
| ABHD17A | CCNYL1   | ENDOD1  | IKBKG  | MX1      | PPM1K    | SIGMAR1  | TMEM41A  |
| ABHD6   | CD109    | ENOX1   | IL17RD | MYADM    | PPP1R12C | SIRT5    | TMEM71   |
| ABR     | CD151    | ENPP1   | IL17RE | MYB      | PPP1R1C  | SIX2     | TMEM97   |
| ACACA   | CD274    | ENTPD3  | INCENP | MYC      | PPP1R3C  | SLC15A3  | TMOD2    |
| ACAT2   | CD4      | EPB41L1 | INF2   | MYCBP2   | PPP1R3D  | SLC16A7  | TMTC1    |
| ACER3   | CD5      | EPB41L2 | INHBA  | MYLIP    | PPP2R2C  | SLC16A9  | TNFAIP2  |
| ACLY    | CD8A     | EPB41L3 | INPP4A | MYO1C    | PPP2R5B  | SLC22A18 | TNFRSF21 |
| ACOT7   | CDC42BPA | EPDR1   | INPP4B | MYO5A    | PPP3CB   | SLC25A1  | TNFSF13  |
| ACOX2   | CDCA2    | EPHA2   | INPP5A | MYO5C    | PRCP     | SLC25A12 | TNIP1    |
| ACSS2   | CDCA7    | EPHA4   | INPP5F | MYO6     | PRDM11   | SLC25A40 | TOB2     |
| ACTL6A  | CDK14    | EPHA5   | INPP5J | MYOM1    | PRDM4    | SLC25A46 | TPBG     |
| ACTR1A  | CDK18    | EPHX4   | INSIG1 | NAALADL1 | PRDX5    | SLC26A11 | TPGS2    |
| ACTR1B  | CDK6     | ESYT1   | IQCA1  | NACAD    | PRELP    | SLC2A13  | TRAF3IP2 |

|          |         |           |           |          |           |          |         |
|----------|---------|-----------|-----------|----------|-----------|----------|---------|
| ADAM23   | CDKN2D  | ETFBKMT   | IQCK      | NACC2    | PREPL     | SLC2A6   | TRAF5   |
| ADAMTS2  | CDR2L   | ETHE1     | IQSEC3    | NAGA     | PRICKLE1  | SLC35D1  | TRAPPC1 |
| ADAMTS7  | CDS2    | EXOC1     | IRS1      | NANS     | PRIMA1    | SLC36A1  | TRHDE   |
| ADAMTSL2 | CDYL2   | EXOSC5    | IRX1      | NAP1L2   | PRKAG2    | SLC39A13 | TRIM2   |
| ADAP1    | CELSR1  | EXPH5     | IRX2      | NAP1L4   | PRKCB     | SLC39A8  | TRIM24  |
| ADCY3    | CEP68   | F7        | IRX3      | NAP1L5   | PRKG2     | SLC41A3  | TRIM37  |
| ADD2     | CERS2   | FABP3     | ISCU      | NARS     | PRPH      | SLC45A1  | TRIP4   |
| ADGRA2   | CFAP298 | FAM102B   | ISLR2     | NBEAL2   | PRRT2     | SLC47A2  | TRIP6   |
| ADGRA3   | CFI     | FAM104A   | ISYNA1    | NCDN     | PRRT3     | SLC4A3   | TRMT2B  |
| ADI1     | CFL2    | FAM110B   | ITGB1BP1  | NCS1     | PRSS16    | SLC6A15  | TRPC3   |
| ADIPOR1  | CHD3    | FAM111A   | ITPK1     | NDEL1    | PRUNE2    | SLC6A17  | TRPM2   |
| ADRA2A   | CHD7    | FAM120AOS | JAK1      | NDRG2    | PSD3      | SLC9A1   | TRPM4   |
| ADRB2    | CHIC1   | FAM124B   | JAKMIP2   | NDRG4    | PSD4      | SLC9A6   | TRPS1   |
| ADSS     | CHRAC1  | FAM131A   | JHY       | NDUFA4L2 | PSIP1     | SLCO2A1  | TRPV2   |
| ADSSL1   | CHRD1   | FAM131B   | KANK3     | NEBL     | PSMA7     | SLCO3A1  | TSC22D3 |
| AFAP1    | CHST9   | FAM189A2  | KCNA2     | NECAP2   | PSMD1     | SMARCC1  | TSPAN2  |
| AFF3     | CIAPIN1 | FAM189B   | KCNAB2    | NEDD4L   | PTDSS1    | SMIM10   | TSPAN31 |
| AGBL5    | CIC     | FAM198B   | KCNC2     | NEFH     | PTH1R     | SMIM12   | TSPAN9  |
| AGO1     | CISD1   | FAM210B   | KCNK1     | NEFL     | PTMS      | SMOC1    | TSPYL4  |
| AGPAT2   | CIT     | FAM219A   | KCNN2     | NEFM     | PTPN3     | SMYD2    | TTC39A  |
| AHNAK2   | CLCN5   | FAM43A    | KCNQ3     | NEK6     | PTPRE     | SMYD3    | TTC39B  |
| AHR      | CLCN6   | FAM49A    | KCNQ4     | NEPRO    | PTPRN2    | SNAPC2   | TTC39C  |
| AIF1L    | CLDN1   | FAM53B    | KCNQ5     | NES      | PTPRU     | SNCA     | TTC7B   |
| AJUBA    | CLDN2   | FAM69A    | KCTD17    | NFATC1   | PXYLP1    | SNCAIP   | TUBA1A  |
| ALDH1B1  | CLIC5   | FAM69B    | KCTD2     | NFE2L1   | PYGB      | SNCG     | TUBA1B  |
| ALDH1L1  | CLIP2   | FAM69C    | KCTD20    | NFIB     | PYGL      | SNN      | TUBB    |
| ALKBH6   | CLSTN2  | FAM83G    | KCTD21    | NFIX     | PYGM      | SNRPD3   | TUBB3   |
| ALPK3    | CLTC    | FAM84A    | KDM5B     | NIPA1    | QPRT      | SNW1     | TUBB4A  |
| AMER1    | CLTCL1  | FAM98A    | KIAA1324L | NIPAL2   | QRFPR     | SNX16    | TUBGCP5 |
| AMPD2    | CLU     | FAR2      | KIF21A    | NIPAL3   | QRICH1    | SNX9     | TULP2   |
| ANK1     | CMAS    | FASN      | KIF3C     | NKAPD1   | QSOX1     | SORBS2   | UBASH3B |
| ANK3     | CMC2    | FAT1      | KIF5A     | NKD2     | RAB11FIP4 | SORL1    | UBE2E2  |
| ANKRD11  | CMPK1   | FBLL1     | KIFAP3    | NKRF     | RAB11FIP5 | SOX5     | UBE2N   |
| ANKRD13A | CNBP    | FBLN1     | KIFC2     | NLRP1    | RAB15     | SP1      | UBE2O   |
| ANKRD13D | CNN3    | FBRS      | KLC1      | NMNAT2   | RAB33A    | SPARCL1  | UBE2T   |
| ANKRD24  | CNNM1   | FBXO2     | KLF13     | NMRK2    | RAB35     | SPATA20  | UBFD1   |
| ANKRD27  | CNOT2   | FBXW5     | KLF7      | NOTCH4   | RAB37     | SPATS2   | UBL4A   |
| ANKRD40  | CNST    | FBXW7     | KLF8      | NOVA1    | RAB3D     | SPHK1    | UCHL1   |
| ANKRD50  | CNTNAP1 | FCHO1     | KNDC1     | NPHP1    | RAB5B     | SPINT1   | UGP2    |



|          |          |                 |         |          |          |                |         |
|----------|----------|-----------------|---------|----------|----------|----------------|---------|
| ANKRD52  | COL11A1  | FDPS            | KREMEN1 | NPR3     | RAB6A    | SPNS2          | URM1    |
| ANKRD9   | COL14A1  | FEZ1            | KRI1    | NPTN     | RAB6B    | SPOCK2         | USB1    |
| ANO4     | COL18A1  | FFAR1           | L1CAM   | NQO2     | RAB8A    | SPTB           | USP14   |
| ANO5     | COL23A1  | FGF10           | LACC1   | NRAS     | RABGGTA  | SPTSSB         | USP25   |
| ANXA11   | COL2A1   | FGF13           | LAMA2   | NRF1     | RAC3     | SQLE           | USP31   |
| ANXA6    | COL3A1   | FGFR1           | LAMA4   | NRN1     | RAP2A    | SREBF2         | USP35   |
| ANXA7    | COL4A3   | FHDC1           | LARP1   | NSG1     | RARRES2  | SRGAP2         | USP5    |
| AP1M1    | COL4A4   | FHL2            | LATS2   | NT5M     | RASA3    | SRPX           | UTRN    |
| AP2B1    | COLCA2   | FIGN            | LDLR    | NUAK1    | RASGRP2  | SSH3           | UXS1    |
| AP3M1    | COPZ1    | FKBP1B          | LGALS1  | NUDT10   | RASGRP3  | ST14           | VAMP1   |
| AP5S1    | CORO1C   | FKBP9           | LGALS3  | NUDT18   | RASSF2   | ST3GAL2        | VANGL1  |
| APBA1    | CORO2A   | FLOT1           | LGALS8  | NUDT3    | RBFOX2   | ST3GAL6        | VAPB    |
| APBA2    | CORO2B   | FLYWCH2         | LGALSL  | NUMBL    | RBPMS    | ST5            | VASH1   |
| APOBEC3C | CORO6    | FMNL1           | LGI2    | NUP214   | RBPMS2   | ST6GAL1        | VIM     |
| APOD     | COX4I2   | FMO3            | LGI3    | NUP37    | RCAN2    | ST6GALNAC<br>2 | VOPP1   |
| APOE     | CPEB1    | FNBP1           | LHFPL2  | NUP93    | RDH10    | ST6GALNAC<br>5 | VPS35   |
| APOL2    | CPED1    | FNDC10          | LIMK1   | NXN      | REEP1    | ST8SIA4        | VSIG10  |
| APP      | CPLX1    | FNDC11          | LIMS2   | ODF3B    | REEP5    | STAC2          | VSTM2L  |
| AR       | CPNE3    | FOCAD           | LIN7A   | OGDH     | RELL2    | STARD13        | VWC2    |
| ARAF     | CPNE9    | FOXD1           | LITAF   | OPA1     | REPS2    | STARD4         | WDR20   |
| ARAP2    | CPZ      | FOXF2           | LIX1L   | OPLAH    | RET      | STAT4          | WDR72   |
| ARFGEF3  | CREG1    | FOXN3           | LMO2    | OPN3     | RETREG1  | STAT6          | WDYHV1  |
| ARFIP1   | CRYAB    | FRY             | LNX1    | OPTN     | RFFL     | STEAP4         | WEE1    |
| ARHGAP42 | CRYL1    | FXYD3           | LPIN1   | OSBPL10  | RFLNA    | STK32A         | YAPI    |
| ARHGAP44 | CSDC2    | FXYD6-<br>FXYD2 | LRFN5   | OSBPL5   | RFX5     | STMN2          | YBX1    |
| ARHGAP6  | CSNK1G3  | GABBR1          | LRP11   | OXCT2    | RGS6     | STMN3          | YWHAB   |
| ARHGAP9  | CSRP2    | GALNT10         | LRP2    | OXR1     | RGS7BP   | STS            | YWHAG   |
| ARHGEF17 | CTDSP1   | GALNT9          | LRP3    | OXTR     | RHNO1    | SUCLG2         | YWHAH   |
| ARHGEF7  | CTIF     | GAREM2          | LRPAP1  | PADI2    | RHOC     | SULF2          | ZBTB7C  |
| ARL8B    | CTNNAL1  | GAS2L3          | LRPPRC  | PAFAH1B1 | RHOD     | SULT4A1        | ZC2HC1A |
| ARMCX3   | CTNNBIP1 | GATB            | LRRC36  | PAFAH1B2 | RHOF     | SURF2          | ZCCHC24 |
| ARNT     | CTNND2   | GCNT4           | LRRC4B  | PAIP2B   | RHOJ     | SUSD1          | ZDHHC23 |
| ARPC2    | CTSH     | GCOM1           | LRRC4C  | PALM3    | RIC8B    | SV2C           | ZDHHC3  |
| ARRB1    | CYB561   | GDI1            | LRRC8C  | PALMD    | RNASEH2B | SVEP1          | ZDHHC5  |
| AS3MT    | CYB5A    | GFOD1           | LRRFIP1 | PAM      | RNF112   | SYDE1          | ZDHHC7  |
| ASAP1    | CYB5R3   | GIPC2           | LRRK2   | PANK1    | RNF121   | SYN2           | ZFAND3  |
| ASAP2    | CYFIP1   | GLI3            | LSS     | PANX1    | RNF144B  | SYN3           | ZFHX3   |
| ATAT1    | CYGB     | GLRB            | LUZP1   | PANX2    | RNLS     | SYNGR3         | ZFHX4   |

|          |          |         |              |          |         |         |        |
|----------|----------|---------|--------------|----------|---------|---------|--------|
| ATL1     | DAP      | GNA12   | LYNX1-SLURP2 | PAQR8    | ROBO1   | SYNJ2   | ZFP92  |
| ATOH8    | DBNDD1   | GNB1    | MAD1L1       | PARP16   | ROBO2   | SYNPO2  | ZFYVE9 |
| ATP10A   | DCBLD1   | GNG12   | MAGEE1       | PATJ     | RPL11   | SYS1    | ZHX2   |
| ATP13A2  | DCDC2    | GNG5    | MAL          | PBXIP1   | RPL12   | SYT11   | ZNRF1  |
| ATP1B1   | DCTN1    | GOLIM4  | MAOB         | PC       | RPL22   | SYT7    | ZNRF2  |
| ATP2B2   | DCTN2    | GOT1    | MAP1A        | PCBP2    | RPL36   | SYTL2   | ZYG11B |
| ATP2B3   | DDAH1    | GPATCH1 | MAP1B        | PCDH9    | RPL4    | TACC3   |        |
| ATP8B2   | DDHD2    | GPC4    | MAP3K20      | PCDHB15  | RPL41   | TAF4B   |        |
| ATRNL1   | DDR2     | GPCPD1  | MAP3K9       | PCMT1    | RPS6KA4 | TAF6    |        |
| ATXN7L3  | DEAF1    | GPM6B   | MAP4         | PCNX2    | RRAGA   | TANC1   |        |
| B3GNT8   | DESI1    | GPR143  | MAP4K4       | PCYT2    | RRAS2   | TANGO2  |        |
| B3GNT9   | DESI1    | GPR161  | MAP7D1       | PDE4A    | RREB1   | TATDN3  |        |
| B4GALNT1 | DGKA     | GPRC5B  | MAPK10       | PDE8B    | RRP1B   | TBC1D30 |        |
| B4GALT5  | DGKQ     | GPX3    | MAPK8IP3     | PDLIM3   | RTN1    | TBC1D4  |        |
| BASP1    | DHCR24   | GPX8    | MAPK9        | PDLIM4   | RTN3    | TBC1D9B |        |
| BBC3     | DIP2C    | GRB2    | MAPRE2       | PDP1     | RUFY2   | TBRG1   |        |
| BBS12    | DISC1    | GRK3    | MARCH2       | PDP2     | RUNDC3B | TC2N    |        |
| BBS9     | DKK3     | GRSF1   | MARCKS       | PDXK     | RUSC1   | TCAF1   |        |
| BCAN     | DLC1     | GSK3B   | MARF1        | PDXP     | RXRG    | TCEAL7  |        |
| BCAS4    | DLG1     | GSTA4   | MARK1        | PDZD7    | RYR2    | TCF25   |        |
| BCL2     | DMTN     | GSTO1   | MARVELD2     | PERM1    | S100A10 | TCF7L2  |        |
| BCL2L11  | DNAJC22  | GTPBP1  | MAST3        | PERP     | S100A13 | TCIRG1  |        |
| BCL2L2   | DNAJC27  | GYG1    | MCF2         | PGM2L1   | S100A16 | TCTN1   |        |
| BDNF     | DNM1L    | GZMK    | MCF2L        | PGRMC2   | SACM1L  | TCTN3   |        |
| BEAN1    | DOCK11   | H2AFY   | MCTP1        | PHACTR3  | SACS    | TEDC2   |        |
| BHMT2    | DOCK5    | H3F3B   | MDH1         | PHF12    | SAE1    | TENM3   |        |
| BICD2    | DOK7     | HABP4   | MDK          | PHF24    | SAMD14  | TESC    |        |
| BLOC1S2  | DPYS     | HADHB   | MED8         | PHLDA2   | SBF2    | TEX261  |        |
| BLVRB    | DPYSL2   | HAGHL   | MEI1         | PHOSPHO1 | SBSPON  | TFCP2   |        |
| BMPR1B   | DSG2     | HARS    | MESD         | PI16     | SC5D    | TFCP2L1 |        |
| BRSK1    | DSP      | HBEGF   | METTL7B      | PI4KA    | SCAMP3  | TGFB11I |        |
| BTD      | DTNB     | HECA    | MFHAS1       | PICK1    | SCD     | TGFBR3L |        |
| C1QTNF1  | DTX4     | HECW2   | MFSD6        | PID1     | SCG5    | TGIF2   |        |
| CA2      | DUSP14   | HEPH    | MGLL         | PIEZO1   | SCN1A   | TGOLN2  |        |
| CA5B     | DUSP3    | HERC5   | MGST2        | PIK3CD   | SCN1B   | THAP10  |        |
| CABLES1  | DYNC1H1  | HERPUD2 | MGST3        | PIP4K2A  | SCN8A   | THEM6   |        |
| CABLES2  | DYNC1H1  | HES6    | MICAL2       | PITHD1   | SCUBE2  | THY1    |        |
| CACFD1   | DYNC1LI1 | HEY2    | MICAL3       | PITPNC1  | SDHA    | TICAM1  |        |
| CACNA2D3 | DYNC1LI2 | HINT1   | MICU1        | PITX2    | SEC23B  | TIFA    |        |

|         |           |          |          |         |          |          |  |
|---------|-----------|----------|----------|---------|----------|----------|--|
| CACNB3  | DYNLL2    | HMGCR    | MIGA2    | PKHD1   | SELENBP1 | TIGD2    |  |
| CALM3   | DYNLT3    | HMOX2    | MITF     | PLA2G4A | SEMA6D   | TIMP4    |  |
| CAMK1   | DYSF      | HNRNPC   | MLLT11   | PLCB1   | SEPT3    | TJP2     |  |
| CAMKK2  | E2F5      | HOPX     | MLPH     | PLCL2   | SEPT5    | TLL1     |  |
| CAMTA2  | EBF1      | HPGD     | MMP15    | PLD1    | SERINC5  | TLR3     |  |
| CAP2    | EEF1AKMT3 | HPS1     | MOAP1    | PLEKHA6 | SERP2    | TM6SF1   |  |
| CAPNS1  | EFEMP2    | HR       | MPP1     | PLK2    | SERPINE2 | TMC6     |  |
| CASP2   | EFR3B     | HSD17B11 | MPP3     | PLS3    | SFRP2    | TMED4    |  |
| CAST    | EFS       | HSP90AB1 | MPST     | PLSCR4  | SFXN1    | TMEM106C |  |
| CAV1    | EGFL7     | HSPA12A  | MRFAP1   | PLVAP   | SGCD     | TMEM120A |  |
| CAV2    | EIF2AK2   | HTR1B    | MRFAP1L1 | PLXDC2  | SGF29    | TMEM123  |  |
| CAVIN1  | EIF4EBP1  | HTR1F    | MROH1    | PMEPA1  | SGSH     | TMEM131L |  |
| CBFB    | EIF5A2    | HYAL3    | MRPS15   | PNMA3   | SH3BGRL2 | TMEM144  |  |
| CBLN3   | ELAVL2    | ICA1     | MRV11    | POC5    | SH3BGRL3 | TMEM150C |  |
| CCDC191 | ELAVL3    | ID3      | MSI2     | PODXL   | SH3GLB2  | TMEM159  |  |
| CCDC69  | ELAVL4    | IDI1     | MSL3     | POFUT1  | SH3RF1   | TMEM179B |  |
| CCDC85A | ELMO1     | IFIT3    | MSRB3    | POLR2C  | SHANK3   | TMEM181  |  |

525

526

527

## References

528

- 529 1. Grover, S., et al., *Comparison of retinal thickness in normal eyes using Stratus and*  
530 *Spectralis optical coherence tomography*. Invest Ophthalmol Vis Sci, 2010. **51**(5): p.  
531 2644-7.
- 532 2. Purves, D., et al., *Neuroscience 2nd edition. sunderland (ma) sinauer associates*. Types  
533 of Eye Movements and Their Functions, 2001.
- 534 3. Nickla, D.L. and J. Wallman, *The multifunctional choroid*. Prog Retin Eye Res, 2010.  
535 **29**(2): p. 144-68.
- 536 4. Bagci, A.M., et al., *Thickness profiles of retinal layers by optical coherence tomography*  
537 *image segmentation*. Am J Ophthalmol, 2008. **146**(5): p. 679-87.
- 538 5. Mori, K., J. Kanno, and P.L. Gehlbach, *Retinochoroidal Morphology Described by Wide-*  
539 *Field Montage Imaging of Spectral Domain Optical Coherence Tomography*. Retina,  
540 2016. **36**(2): p. 375-84.
- 541 6. Holt, R., et al., *Identification of rod- and cone-specific expression signatures to identify*  
542 *candidate genes for retinal disease*. Exp Eye Res, 2015. **132**: p. 161-73.
- 543 7. Daiger, S., et al., *Data services and software for identifying genes and mutations causing*  
544 *retinal degeneration*. Invest Ophthalmol Vis Sci, 1998. **39**(S295).
- 545 8. Di Pierdomenico, J., et al., *Early events in retinal degeneration caused by rhodopsin*  
546 *mutation or pigment epithelium malfunction: differences and similarities*. Frontiers in  
547 neuroanatomy, 2017. **11**: p. 14.
- 548 9. Lamin, A., et al., *Changes in volume of various retinal layers over time in early and*  
549 *intermediate age-related macular degeneration*. Eye, 2019. **33**(3): p. 428-434.

- 550 10. Jones, B.W., R.E. Marc, and R.L. Pfeiffer, *Retinal degeneration, remodeling and*  
551 *plasticity*. 2018.
- 552 11. MacDonald, I.M. and T. Lee, *Best vitelliform macular dystrophy*. 2013.
- 553 12. Walia, S. and G.A. Fishman, *Natural history of phenotypic changes in Stargardt macular*  
554 *dystrophy*. *Ophthalmic genetics*, 2009. **30**(2): p. 63-68.
- 555 13. Li, M., et al., *Comprehensive analysis of gene expression in human retina and supporting*  
556 *tissues*. *Human molecular genetics*, 2014. **23**(15): p. 4001-4014.
- 557 14. Whitmore, S.S., et al., *Transcriptomic analysis across nasal, temporal, and macular*  
558 *regions of human neural retina and RPE/choroid by RNA-Seq*. *Experimental eye*  
559 *research*, 2014. **129**: p. 93-106.
- 560 15. Peng, Y.-R., et al., *Molecular classification and comparative taxonomics of foveal and*  
561 *peripheral cells in primate retina*. *Cell*, 2019. **176**(5): p. 1222-1237. e22.
- 562 16. Voigt, A., et al., *Molecular characterization of foveal versus peripheral human retina by*  
563 *single-cell RNA sequencing*. *Experimental eye research*, 2019. **184**: p. 234-242.
- 564 17. Patro, R., et al., *Salmon provides fast and bias-aware quantification of transcript*  
565 *expression*. *Nature methods*, 2017. **14**(4): p. 417-419.
- 566 18. Sonesson, C., M.I. Love, and M.D. Robinson, *Differential analyses for RNA-seq:*  
567 *transcript-level estimates improve gene-level inferences*. *F1000Research*, 2015. **4**.
- 568 19. Love, M.I., W. Huber, and S. Anders, *Moderated estimation of fold change and*  
569 *dispersion for RNA-seq data with DESeq2*. *Genome biology*, 2014. **15**(12): p. 1-21.
- 570 20. Harrow, J., et al., *GENCODE: the reference human genome annotation for The*  
571 *ENCODE Project*. *Genome research*, 2012. **22**(9): p. 1760-1774.
- 572 21. Yates, B., et al., *Genenames.org: the HGNC and VGNC resources in 2017*. *Nucleic*  
573 *acids research*, 2016: p. gkw1033.
- 574 22. Ignatiadis, N., et al., *Data-driven hypothesis weighting increases detection power in*  
575 *genome-scale multiple testing*. *Nature methods*, 2016. **13**(7): p. 577-580.
- 576 23. Yu, G., et al., *clusterProfiler: an R package for comparing biological themes among gene*  
577 *clusters*. *Omics: a journal of integrative biology*, 2012. **16**(5): p. 284-287.
- 578 24. Robinson, M.D., D.J. McCarthy, and G.K. Smyth, *edgeR: a Bioconductor package for*  
579 *differential expression analysis of digital gene expression data*. *Bioinformatics*, 2010.  
580 **26**(1): p. 139-140.
- 581 25. Gu, Z., R. Eils, and M. Schlesner, *Complex heatmaps reveal patterns and correlations in*  
582 *multidimensional genomic data*. *Bioinformatics*, 2016. **32**(18): p. 2847-2849.
- 583 26. Cowan, C.S., et al., *Cell types of the human retina and its organoids at single-cell*  
584 *resolution*. *Cell*, 2020. **182**(6): p. 1623-1640. e34.
- 585 27. Voigt, A.P., et al., *Single-cell transcriptomics of the human retinal pigment epithelium*  
586 *and choroid in health and macular degeneration*. *Proceedings of the National Academy*  
587 *of Sciences*, 2019. **116**(48): p. 24100-24107.
- 588 28. Yan, W., et al., *Cell atlas of the human fovea and peripheral retina*. *Scientific reports*,  
589 2020. **10**(1): p. 1-17.
- 590 29. Voigt, A.P., et al., *Bulk and single-cell gene expression analyses reveal aging human*  
591 *choriocapillaris has pro-inflammatory phenotype*. *Microvascular Research*, 2020. **131**: p.  
592 104031.
- 593 30. Swamy, V.S., et al., *Building the mega single cell transcriptome ocular meta-atlas*.  
594 bioRxiv, 2021.

- 595 31. Köster, J. and S. Rahmann, *Snakemake—a scalable bioinformatics workflow engine*.  
596 Bioinformatics, 2012. **28**(19): p. 2520-2522.
- 597 32. Boulton, M. and P. Dayhaw-Barker, *The role of the retinal pigment epithelium:*  
598 *topographical variation and ageing changes*. Eye, 2001. **15**(3): p. 384-389.
- 599 33. Milam, A.H., et al., *Dominant late-onset retinal degeneration with regional variation of*  
600 *sub-retinal pigment epithelium deposits, retinal function, and photoreceptor*  
601 *degeneration*. Ophthalmology, 2000. **107**(12): p. 2256-2266.
- 602 34. Hamel, J.-F., *Les ruines du progrès chez Walter Benjamin: anticipation futuriste, fausse*  
603 *reconnaissance et politique du présent*. Protée, 2007. **35**(2): p. 7-14.
- 604 35. Mustafi, D., et al., *Transcriptome analysis reveals rod/cone photoreceptor specific*  
605 *signatures across mammalian retinas*. Human molecular genetics, 2016. **25**(20): p. 4376-  
606 4388.
- 607 36. Swamy, V. and D. McGaughey, *Eye in a disk: eyeIntegration human pan-eye and body*  
608 *transcriptome database version 1.0*. Investigative ophthalmology & visual science, 2019.  
609 **60**(8): p. 3236-3246.
- 610 37. Efremova, M., et al., *CellPhoneDB: inferring cell–cell communication from combined*  
611 *expression of multi-subunit ligand–receptor complexes*. Nature protocols, 2020. **15**(4): p.  
612 1484-1506.
- 613 38. R Sparrow, J., D. Hicks, and C. P Hamel, *The retinal pigment epithelium in health and*  
614 *disease*. Current molecular medicine, 2010. **10**(9): p. 802-823.
- 615 39. Zou, H., et al., *Polarity and epithelial-mesenchymal transition of retinal pigment*  
616 *epithelial cells in proliferative vitreoretinopathy*. PeerJ, 2020. **8**: p. e10136.
- 617 40. Paterson, E.N., et al., *Association of reduced inner retinal thicknesses with chronic*  
618 *kidney disease*. BMC nephrology, 2020. **21**(1): p. 1-12.
- 619 41. Balmforth, C., et al., *Chorioretinal thinning in chronic kidney disease links to*  
620 *inflammation and endothelial dysfunction*. JCI insight, 2016. **1**(20).
- 621 42. Dewing, J.M., et al., *The Diverse Roles of TIMP-3: Insights into degenerative diseases of*  
622 *the senescent retina and brain*. Cells, 2020. **9**(1): p. 39.
- 623 43. Simeonov, D.R., et al., *DNA variations in oculocutaneous albinism: an updated mutation*  
624 *list and current outstanding issues in molecular diagnostics*. Human mutation, 2013.  
625 **34**(6): p. 827-835.
- 626 44. Zou, Z., et al., *Targeted Vezf1-null mutation impairs vascular structure formation during*  
627 *embryonic stem cell differentiation*. Arteriosclerosis, thrombosis, and vascular biology,  
628 2010. **30**(7): p. 1378-1388.
- 629 45. Tang, K., et al., *COUP-TFs regulate eye development by controlling factors essential for*  
630 *optic vesicle morphogenesis*. Development, 2010. **137**(5): p. 725-734.
- 631 46. Budi, E.H., L.B. Patterson, and D.M. Parichy, *Embryonic requirements for ErbB*  
632 *signaling in neural crest development and adult pigment pattern formation*. 2008.
- 633 47. Martemyanov, K.A., *G protein signaling in the retina and beyond: the Cogan lecture*.  
634 Investigative ophthalmology & visual science, 2014. **55**(12): p. 8201-8207.
- 635 48. Lee, M., et al., *Hippo–yap signaling in ocular development and disease*. Developmental  
636 Dynamics, 2018. **247**(6): p. 794-806.
- 637 49. Reyes, A.P., et al., *Identification of cell surface markers and establishment of monolayer*  
638 *differentiation to retinal pigment epithelial cells*. Nature communications, 2020. **11**(1): p.  
639 1-15.

- 640 50. Radeke, M.J., et al., *Disease susceptibility of the human macula: differential gene*  
641 *transcription in the retinal pigmented epithelium/choroid*. Experimental eye research,  
642 2007. **85**(3): p. 366-380.
- 643 51. van Soest, S., et al., *Comparison of human RPE gene expression in macula and periphery*  
644 *highlights potential topographic differences in Bruch's membrane*. Mol Vis, 2007. **13**: p.  
645 1608-1617.
- 646 52. Zhu, S., et al., *Molecular structure, gene expression and functional role of WFDC1 in*  
647 *angiogenesis and cancer*. Cell Biochemistry and Function, 2021.  
648
